## ***Chd8* haploinsufficient mice display anomalous behaviours, increased brain size and cortical hyper-connectivity**

Philipp Suetterlin<sup>1\*</sup>, Shaun Hurley<sup>1\*</sup>, Conor Mohan<sup>1\*</sup>, Kimberley L. H. Riegman<sup>1\*</sup>, Marco Pagani<sup>2</sup>, Angela Caruso<sup>3,4</sup>, Jacob Ellegood<sup>5</sup>, Alberto Galbusera<sup>2</sup>, Ivan Crespo-Enriquez<sup>1</sup>, Caterina Michetti<sup>3,6</sup>, Robert Ellingford<sup>1</sup>, Olivier Brock<sup>7</sup>, Alessio Delogu<sup>7</sup>, Philippa Francis-West<sup>1</sup>, Jason P. Lerch<sup>5</sup>, Maria Luisa Scattoni<sup>3</sup>, Alessandro Gozzi<sup>2</sup>, Cathy Fernandes<sup>8,9</sup>, & M. Albert Basson<sup>1,9^</sup>

<sup>1</sup>Department of Craniofacial Development and Stem Cell Biology, King's College London, Floor 27, Guy's Hospital Tower Wing, London, SE1 9RT, UK

<sup>2</sup>Functional Neuroimaging Laboratory, Center for Neuroscience and Cognitive Systems @ UniTn, 38068 Rovereto, TN, Italy

<sup>3</sup>Neurotoxicology and Neuroendocrinology Section, Department of Cell Biology and Neuroscience, Istituto Superiore di Sanità, Viale Regina Elena 299, 00161 Rome, Italy

<sup>4</sup>School of Behavioural Neuroscience, Department of Psychology, Sapienza University of Rome, via dei Marsi 78, 00185, Rome, Italy

<sup>5</sup>Department of Medical Biophysics, University of Toronto, Mouse Imaging Centre, Hospital for Sick Children, 25 Orde Street, Toronto, Ontario M5T 3H7, Canada

<sup>6</sup>Center for Synaptic Neuroscience and Technology, Istituto Italiano di Tecnologia, Genova, Italy

<sup>7</sup>Department of Basic and Clinical Neuroscience, Institute of Psychiatry, Psychology & Neuroscience, King's College London, UK

<sup>8</sup>MRC Social, Genetic & Developmental Psychiatry Centre, PO82, Institute of Psychiatry, Psychology & Neuroscience, King's College London, De Crespigny Park, London SE5 8AF, UK

<sup>9</sup>MRC Centre for Neurodevelopmental Disorders, King's College London, 4<sup>th</sup> floor, New Hunt's House, London SE1 1UL, UK

\* First co-authors

^Corresponding author

## ABSTRACT

Truncating *CHD8* mutations are amongst the highest confidence risk factors for autism spectrum disorders (ASD) identified to date. To investigate how *Chd8* haploinsufficiency disrupts brain development and predisposes individuals to ASD, we generated and characterised a *Chd8* heterozygous mouse model. In line with clinical observations of humans with *CHD8* mutations, *Chd8* heterozygous mice display subtle brain hyperplasia, hypertelorism and anomalous behaviours, although autism-like social deficits, repetitive and restricted behaviours are not present. Few gene expression changes were observed in the mid-gestation embryonic neocortex, whilst over 600 genes were differentially expressed in the neocortex five days after birth. These genes included several known autism candidate genes. Amongst the down-regulated transcripts, genes involved in cell adhesion and axon guidance were particularly prominent, implicating altered connectivity as a potential mechanism underlying the behavioural phenotypes. Accordingly, resting state functional MRI identified increased synchronised activity in cortico-hippocampal and auditory-parietal networks, previously implicated in ASD. Together, these data show that *Chd8* heterozygous mice recapitulate key clinical features found in patients with *CHD8* mutations and suggest that distinctive anomalies in brain connectivity underlie the neuropsychiatric phenotypes associated with *CHD8* haploinsufficiency.

Autism spectrum disorder (ASD) is diagnosed on the basis of socio-communicative deficits and repetitive, perseverative behaviours with restricted interests (APA, 2013). ASD is frequently associated with comorbidities like hyper-sensitivity to sensory stimuli, seizures and anxiety (Croen et al., 2015; Jeste and Tuchman, 2015; Lane et al., 2014; Tavassoli et al., 2014). The phenotypic and genetic heterogeneity of ASD has hampered the elucidation of the mechanisms underlying the neuropsychiatric phenotypes. However, the recent identification of de novo, likely gene disrupting (LGD) mutations that show highly significant associations with autism (Iossifov et al., 2014; Neale et al., 2012; O'Roak et al., 2014; O'Roak et al., 2012b; Talkowski et al., 2012) provides an opportunity to phenotype and molecularly characterise genetically defined ASD subtypes.

Exome sequencing studies of several thousand simplex families (each with one child with ASD) detected de novo, likely gene disrupting (LGD) mutations in the *CHD8* (Chromodomain Helicase DNA binding factor 8) gene (Iossifov et al., 2014; Neale et al., 2012; O'Roak et al., 2014; O'Roak et al., 2012b; Talkowski et al., 2012). Patients with *CHD8* mutations are characterised by a high prevalence of autism, macrocephaly, facial dysmorphisms, motor delay and hypotonia, intellectual disability and gastro-intestinal problems, and less commonly by anxiety, seizures and hyperactivity (Bernier et al., 2014; Merner et al., 2016; Stessman et al., 2017; Stolerman et al., 2016). *CHD8* encodes an ATP-dependent chromatin remodelling protein of the chromodomain helicase DNA binding family (Thompson et al., 2008; Yuan et al., 2007). *CHD8* is recruited to promoters of many actively transcribed genes in mouse and human neural progenitors, with *CHD8* knock-down in these cells resulting in downregulation of many ASD-associated genes (Cotney et al., 2015; Sugathan et al., 2014). Dysregulation of these genes may therefore contribute to the autistic and macrocephalic phenotypes associated with human *CHD8* haploinsufficiency. Consistent

with this hypothesis, two groups recently reported mild brain overgrowth and autistic-like anomalies in *Chd8*<sup>+/-</sup> mice, suggesting that *Chd8* heterozygosity may be sufficient to cause these phenotypes (Katayama et al., 2016; Platt et al., 2017). However, the behavioural effects reported are subtle, associated with high levels of general anxiety in test animals (Katayama et al., 2016) and not typically associated with ASD (Platt et al., 2017), raising the possibility that the phenotypes in these mice may differ from other ASD mouse models in important ways. An important question therefore is whether the critical brain phenotypes that underlie the ASD diagnosis in patients with *CHD8* mutations can be modelled in *Chd8*<sup>+/-</sup> mice, and whether the brain anomalies and molecular changes in these mice are similar to, or distinct from other ASD mouse models.

A prominent theory regarding the origins of the neuropsychiatric deficits observed in ASD is an alteration of connectivity patterns that favours local over-connectivity and long-range under-connectivity in the autistic brain (Belmonte et al., 2004; Just et al., 2004). Functional brain connectivity can be probed by resting state functional MRI (rsfMRI), a method based on localised changes in blood flow upon neuronal activity. These changes are commonly measured as fluctuations in the blood-oxygen-level dependent (BOLD) signal, with functionally connected areas acting in synchrony. Indeed, rsfMRI studies in ASD patients have provided evidence for reduced long-range synchronisation in spontaneous brain activity (reviewed in Picci et al., 2016). However, consistent with the heterogeneous nature of ASD, evidence for increased long-range connectivity has also been reported (Di Martino et al., 2014). Together, these studies are consistent with the notion that the exact nature of aberrant functional connectivity in ASD may depend on the specific underlying aetiology.

Few rsfMRI studies have been performed in ASD mouse models, but initial reports appear consistent with human findings (Liska and Gozzi, 2016). The *Fmr1*<sup>-y</sup> mouse model of fragile X syndrome is characterised by local hyper-connectivity of the primary visual cortex, while connectivity from visual cortex to other sensory areas is reduced (Haberl et al., 2015). Homozygous *Cntnap2* mouse mutants exhibit hypo-connectivity of the default mode network, a network that consists of the synchronised spontaneous activation of the frontal, cingulate and retrosplenial cortex (Liska et al., 2017). Reduced functional connectivity in the default mode network is consistently observed in ASD patients in human rsfMRI studies (Cherkassky et al., 2006) and these findings recapitulates analogous clinical findings in humans with *CNTNAP2* mutations (Scott-Van Zeeland et al., 2010). The inbred BTBR T+tf/J ASD mouse model also displays fronto-cortical hypo-connectivity (Sforazzini et al., 2016), further supporting the association between autistic behaviours and reduced long-range functional connectivity.

To further understand how *Chd8* haploinsufficiency may disrupt brain development and cause ASD, we generated a new *Chd8*<sup>+/-</sup> mouse model, where exon 3 of *CHD8* is deleted leading to a protein lacking all functional domains, equivalent to early nonsense and frameshift mutations found in patients (Barnard et al., 2015). We found evidence for several anatomical features reminiscent of humans with *CHD8* mutations. *Chd8*<sup>+/-</sup> mice did not exhibit autism-like behaviours, despite a range of behavioural anomalies. Interestingly, gene expression in the embryonic neocortex was only mildly perturbed, with significant changes emerging postnatally. Transcriptional networks involved in developmental processes relating to brain connectivity were found to be significantly disrupted and rsfMRI experiments provided evidence for over-connectivity of sensory and hippocampal networks, suggestive of a connectivity phenotype that is distinct from other ASD mouse models.



## RESULTS

A mouse line with a conditional *Chd8* allele was produced through homologous recombination in C57Bl/6J embryonic stem cells (Fig. S1A, B). *Chd8<sup>flox</sup>* mice were crossed with the ubiquitously expressing *βactin*-Cre line (Lewandoski and Martin, 1997) on a C57Bl/6J background to generate *Chd8<sup>+/-</sup>* mice (Fig. S1C). Cre-mediated deletion of loxP-flanked (flox) exon 3 results in an early frameshift and termination of translation at amino acid 419, predicted to produce a protein that lacks all functional domains, equivalent to nonsense and frameshift mutations terminating CHD8 at amino acids 62 and 747 in patients (Barnard et al., 2015).

Quantitative RT-PCR on RNA isolated from E12.5 and P5 neocortices found that total *Chd8* expression was reduced by 64% (p=0.006, student's t-test) and 52% (p=0.01, student's t-test) respectively (Fig. S1D). Western blot experiments using an antibody against the N-terminal region of CHD8 (amino acids 325 – 350) on lysates from E12.5 neocortex revealed a 51% reduction in CHD8 protein levels in heterozygotes compared to controls (Fig. S1E,F), validating our *Chd8<sup>+/-</sup>* mice as a suitable model for *CHD8* haploinsufficiency. Importantly, we found no evidence for a truncated protein product of 419aa (~45kDa) that may have resulted from translation of the mutant transcript (Fig. S1E).

### ***Chd8* heterozygous mice have specific craniofacial and structural brain phenotypes**

Humans with truncating mutations in a single *CHD8* allele often present with macrocephaly (64%) and distinct craniofacial phenotypes (89%), which include hypertelorism (wide-set eyes, 67%) (Bernier et al., 2014; Stessman et al., 2017). We characterised the cranium and brain of *Chd8<sup>+/-</sup>* mice to ask whether these phenotypes are also present in *Chd8<sup>+/-</sup>* mice. Micro-CT analyses found that the interorbital distance (landmarks 8-9, Fig. 1C,D) is

significantly wider in *Chd8*<sup>+/-</sup> mice compared to controls, indicative of a hypertelorlic phenotype (Fig. 1C,D,F). In addition, the anterior-posterior length of the interparietal bone (landmarks 4-5) is increased in *Chd8*<sup>+/-</sup> animals (Fig. 1A,B,E), suggestive of more widespread craniofacial anomalies associated with *CHD8* haploinsufficiency.

To examine whether specific structural brain abnormalities are present in *Chd8*<sup>+/-</sup> mice, their brains were compared to *Chd8*<sup>+/+</sup> littermates by high resolution MRI (Fig 1G). Total brain volume was increased by 2.7% in *Chd8*<sup>+/-</sup> mice (476mm<sup>3</sup> vs. 463mm<sup>3</sup>, p=0.048, FDR=15%, Fig. 1H). Accordingly, several brain regions, including cortical areas, hippocampus and parts of the cerebellum (Fig. 1G, H, Supplementary Table 1) showed volumetric increases. Structural alterations of these brain areas have been implicated in autism (Blatt, 2012; Donovan and Basson, 2017; Ecker, 2016) providing potential neural substrates for the autism phenotype associated with *CHD8* haploinsufficiency in humans.

### ***Chd8*<sup>+/-</sup> mice exhibit complex behavioural abnormalities not typical of autism mouse models**

*CHD8* heterozygosity is strongly associated with autism in the human population (Iossifov et al., 2014; Neale et al., 2012; O'Roak et al., 2014; O'Roak et al., 2012b; Talkowski et al., 2012). We therefore asked whether *Chd8*<sup>+/-</sup> mice exhibited any autism-like behavioural abnormalities. *Chd8*<sup>+/-</sup> mice demonstrated normal social preference in the three-chamber social investigation test, spending significantly more time in the chamber with the novel age- and sex-matched conspecific mouse than in the other chambers (Fig. 2A). Interestingly, rather than displaying social deficits, mutant mice spent slightly more time in the chamber containing the mouse, compared to controls (Fig. 2A). *Chd8*<sup>+/-</sup> mice also spent more time investigating conspecific mice in a reciprocal social interaction test (Fig. 2B). A quantitative



olfactory habituation/dishabituation test also revealed an increased interest in an odour with social significance (urine) in *Chd8*<sup>+/-</sup> mice compared to controls, as measured by the cumulative time spent sniffing the odour (Fig. 2C). No difference in the time spent investigating a non-social (banana) odour was observed, implying an increased interest specifically in social cues and an otherwise normal capacity for odour discrimination (Fig. 2C).

No evidence of repetitive behaviours was observed by assessing marble burying or self-grooming behaviours (Fig. 2D,E). In fact, mutants showed slightly delayed marble burying behaviour (Fig. 2D). Examination of these animals in the open field arena revealed a marked hypo-activity in *Chd8*<sup>+/-</sup> mice (Fig. 2F,G). The open field test did not show any evidence of behaviours typically associated with anxiety in mice, i.e. an increased reluctance to enter the inner, most exposed area of an open field arena (Fig. 2H). This was confirmed in the light/dark box test that showed no difference between wildtype and mutant mice (Fig. 2I). The hypo-active phenotype observed in the open field test was also present in mutant mice in their homecage environment by measuring activity on a running wheel over a one-week period (Fig. 2J). Slightly weaker forelimb grip strength was measured in mutant mice (Fig. 2K) but *Chd8*<sup>+/-</sup> mice showed normal abilities on the revolving rotarod, indicating that the hypo-active phenotype was not due to general motor deficits (Fig. 2L). Spatial learning abilities and cognitive flexibility were assessed in the hippocampus-dependent Morris water maze test. *Chd8*<sup>+/-</sup> mice performed normally in the learning part of this test (Fig. 2M). In a reversal paradigm, these mice were also indistinguishable from wildtype littermates, implying normal cognitive, spatial learning abilities and flexibility (Fig. 2M). Finally, no differences in the number of ultrasonic vocalisations (USVs) of pups separated from the nest were recorded, indicating no obvious communication deficits (Fig. 2N).

*Chd8* heterozygous pups showed evidence for delayed motor development in the first two weeks after birth. *Chd8*<sup>+/-</sup> pups took slightly longer than wildtype littermates to develop an effective righting reflex over time (Figure 2O). Correspondingly, *Chd8*<sup>+/-</sup> pups spent more time engaged in unsuccessful attempts to turn over on their stomachs as measured during the spontaneous motor behaviour observations during USV recordings (Figure 2P). Once they were able to move around the cage, pups showed evidence of hyperactivity (Figure 2Q).

In summary, adult *Chd8*<sup>+/-</sup> mice consistently exhibited a hypo-active phenotype while pups showed evidence for hyperactivity. *Chd8*<sup>+/-</sup> mice showed little evidence of behaviours typically observed in mouse models of ASD. Rather, a heightened interest in social cues was evident in *Chd8*<sup>+/-</sup> mice.

### ***Chd8* haploinsufficiency causes postnatal brain overgrowth coupled with reduced body weight.**

To characterise the developmental delay observed during behavioural testing and the brain overgrowth phenotype detected by MRI analysis further, postnatal body weight trajectories were established and correlated with brain weights at different developmental stages. A survey of body weight during postnatal development identified significant growth retardation of *Chd8*<sup>+/-</sup> pups from postnatal day 4 onwards that culminated in a highly significant statistical difference between the two groups at P35 (15.8%,  $p < 0.001$ , Fig. 3A). Brain and body weight were well correlated in both wildtype and heterozygous mice ( $r^2 = 0.25$ ,  $p = 0.0004$  and  $r^2 = 0.28$ ,  $p = 0.005$ , respectively). This analysis revealed that *Chd8* mutants had higher brain weights compared to their wildtype littermate controls with equivalent body weight (Fig. 3B). A group-wise comparison confirmed the significant increase in normalised brain

weight in *Chd8*<sup>+/-</sup> mice compared to wildtype littermates at P35 (Fig. 3C; 20.4% increase,  $p < 0.001$ ).

To identify the developmental time window when signs of brain overgrowth first emerge, normalised brain weights were examined at earlier developmental stages. At P7, normalised brain weights were already significantly larger in *Chd8*<sup>+/-</sup> pups compared to wildtype littermate controls, with more subtle changes observed at P0, suggesting that the phenotype emerged around this time. Indeed, the same analysis at E16.5 showed a trend towards increased brain size but did not detect any significant differences in *Chd8*<sup>+/-</sup> embryos (Fig. 3D). Together, these analyses suggested that small differences in brain growth over several days during late embryonic and early postnatal development may be responsible for small, progressive increases in brain size. Indeed, we did not detect any significant differences in cortical ventricular zone (VZ) proliferation as measured by phospho-histone H3 immunostaining at E12.5, E16.5 and P0 (Fig. 3E,F).

In summary, our analyses of brain weights were in agreement with the volumetric changes detected by MRI in adult mice and implicated an uncoupling of postnatal brain growth from overall growth as a potential cause of the macrocephalic phenotype observed in patients with *CHD8* mutations. Moreover, the developmental motor delay observed in *Chd8*<sup>+/-</sup> pups was underpinned by delayed acquisition of body weight in the first few weeks after birth, a phenotype that resolved by 3 months of age, when body weights of *Chd8* heterozygous mice were indistinguishable from wildtype littermate controls (data not shown).

### **CHD8 controls the expression of ASD-associated genes in early postnatal neocortex.**

To gain insights into the transcriptional programmes that may underlie the subtle brain overgrowth and abnormal behaviours observed in *Chd8*<sup>+/-</sup> mice, we performed RNA-seq analysis on dissected neocortical tissue at two stages: 1) At E12.5, when *Chd8* expression peaks (Durak et al., 2016) and neural progenitor cells predominate, and 2) At P5, when many developmental processes with relevance for ASD aetiology, such as axon growth and guidance and synaptogenesis, are taking place and the vast majority of neural cells are post-mitotic.

Surprisingly, only 5 genes, including *Chd8*, showed significant (FDR<0.05) differential expression in *Chd8*<sup>+/-</sup> embryos at E12.5 (Fig. 4A, Supplementary Table 2). By contrast, 649 genes (FDR<0.05) were differentially expressed in the neocortex at P5, with over two thirds of them downregulated (Fig. 4B, Supplementary Table 3).

Comparing all differentially expressed genes (DEGs) from the P5 dataset with the SFARI autism gene list identified 56 shared genes, representing a highly significant enrichment of ASD-associated genes in the differentially expressed gene set ( $p=1.06 \times 10^{-10}$  (OR=2.87), Fisher's exact test for count data, Fig. 4C, Supplementary Table 4). 53 out of 56 of these ASD-associated genes were down-regulated (95%, Supplementary Table 4). We also overlapped our gene set with high confidence (SFARI categories 1&2) ASD candidates ( $p=3.26 \times 10^{-4}$  (OR=4.61), Fisher's exact test for count data Fig. 4D). Nine genes, representing 16% of all SFARI category 1 & 2 genes, were present in our differentially expressed gene set at P5 and all of these genes were downregulated (Supplementary Table 4).

Amongst the upregulated gene set, the most significant KEGG pathways and biological processes were related to the ribosome and oxidative phosphorylation, whereas the downregulated gene set included categories related to cell adhesion, axonal guidance and calcium signaling pathways (Fig. 4E, Supplementary Fig. 2A, Supplementary tables 5-10). Identification of potential regulatory transcription factors was performed using Enrichr, which found over-representation of Suz12 targets in the down-regulated gene set (Supplementary Fig. 2B). Suz12 is a component of the Polycomb repressor complex 2 (PCR2) and is required for both histone methyl transferase and gene silencing activities of PRC2 (Cao and Zhang, 2004). The observation that Suz12 targets are over-represented in the down-regulated gene set offers a potential mechanistic explanation for the down-regulation of some of the identified genes. None of the genes that code for components of PRC2, including *Suz12*, are differentially expressed at P5, suggesting that the enrichment seen was unlikely to be due to direct transcriptional dysregulation of polycomb gene expression.

The significant enrichment of cell adhesion and axonal guidance genes in the down-regulated gene set at P5 suggested the possibility that long-range connectivity and synaptogenesis might be disrupted in *Chd8* heterozygous neocortices.

### ***Chd8*<sup>+/-</sup> mice exhibit over-connectivity in cortical and subcortical networks**

To test whether the observed gene expression changes at P5 indeed pre-figured functional alterations in mature brain networks, we performed resting state functional MRI (rsfMRI) in adult mice. A regionally unbiased analysis for long-range connectivity changes revealed hotspots for increased connectivity in *Chd8*<sup>+/-</sup> mice, which included entorhinal, retrosplenial, auditory cortical and posterior hippocampal areas (t-test,  $P < 0.05$  FEW cluster-corrected, with cluster-defining threshold  $t_{24} > 2.06$ ,  $P < 0.05$ ; orange areas in Fig. 5A). These hyper-connected

areas were predominantly located on the left side of the brain. A re-analysis of these results without the use of cluster correction revealed the presence of foci with increased connectivity also on the right side, mirroring the effects observed on the left (dark red areas in Fig. 5A). Inter-hemispheric mapping of rsfMRI connectivity strength in previously characterized rsfMRI network systems of the mouse brain (Sforazzini et al., 2014), revealed increased cortical connectivity in auditory regions ( $p < 0.05$ , Student t test, uncorrected), although the effect did not survive false discovery rate correction ( $q = 0.05$ ) for multiple comparison across the rsfMRI networks probed. We next used a seed-based approach to specifically probe regions with altered connectivity to these hotspots to reveal the brain networks affected. Most strikingly, this revealed a reciprocal increase in connectivity between ventral hippocampus and auditory cortical regions in *Chd8* mutant mice (t-test,  $P < 0.05$  FEW cluster-corrected, with cluster-defining threshold  $t_{24} > 2.06$ ,  $P < 0.05$ ; Fig. 5B,C). Seed placement in the auditory cortex further revealed increased connectivity of this region with both cingulate and entorhinal cortices (Fig. 5B), whereas a hippocampal seed uncovered strengthened long-range connectivity with somatosensory and visual cortices (Fig 5C). These findings suggested that specific cortical-subcortical circuits involved in sensory processing may be altered in *Chd8*<sup>+/-</sup> mice.

## DISCUSSION

CHD8 is one of the highest confidence ASD-associated genes to emerge from recent exome sequencing studies (Bernier et al., 2014; Iossifov et al., 2014; Neale et al., 2012; O'Roak et al., 2012a; Talkowski et al., 2012). We therefore expected *Chd8*<sup>+/-</sup> mice to present with robust, autism-like behaviours. Contrary to these expectations, *Chd8*<sup>+/-</sup> mice displayed distinctive behavioural anomalies that featured a heightened interest in social cues, but did not include autism-like behaviours. Gene expression analysis showed little evidence for transcriptional dysregulation at mid-embryonic stages, but revealed disruption of key developmental processes involved in establishing brain connectivity in the early postnatal neocortex. Many of these dysregulated transcripts, which were predominantly down-regulated, are themselves ASD-associated genes, providing a strong rationale for the ASD phenotype associated with *Chd8* deficiency in patients. Significantly, the disruption of these neurodevelopmental transcriptional networks was succeeded by alterations in functional connectivity in the adult brain. Resting state functional MRI analysis found evidence for over-connectivity in a number of cortical subcortical networks. Most notably, the auditory cortex showed a pronounced global increase in functional connectivity that involved connections to other cortical areas and reciprocal strengthening of connectivity to the hippocampus. These findings identify a crucial developmental function for *CHD8* in the early postnatal period and, for the first time, associates *CHD8* haploinsufficiency with altered functional connectivity of brain areas with possible relevance to ASD. We conclude that *Chd8* haploinsufficiency results in a distinct complement of neurodevelopmental and behavioural anomalies in mice and propose that these mice will represent a useful model for elucidating the molecular mechanisms underlying the ASD subtype associated with *CHD8* haploinsufficiency in humans.

### ***Chd8*<sup>+/-</sup> mice as a model for human *CHD8* haploinsufficiency syndrome**

We report several phenotypes in *Chd8*<sup>+/-</sup> mice that have been associated with *CHD8* haploinsufficiency in humans. These include hypertelorism and delayed motor development. We also describe postnatal brain overgrowth when correcting for body weight, which may underlie the macrocephaly observed in the majority of patients described by Bernier et al. (Bernier et al., 2014). Together, these findings indicate that core functions of *CHD8* in craniofacial and brain development are conserved between mouse and human, with previous studies suggesting that this is also true for non-mammalian species such as zebrafish (Bernier et al., 2014; Sugathan et al., 2014).

Despite the high prevalence of autistic behaviours observed in human *CHD8* haploinsufficiency, *Chd8*<sup>+/-</sup> mice do not exhibit socio-communicative deficits, repetitive or perseverative behaviours. This is apparently at odds with recent studies of other *Chd8* heterozygous mouse models that reported social deficits (Katayama et al., 2016; Platt et al., 2017). However, the results reported in those studies are subtle and accompanied by unusually high levels of anxiety in all test groups in the study by Katayama et al. (2016), a known confound in behavioural tests. Intriguingly, our tests revealed an apparent heightened interest in social cues, indicating that altering the *Chd8* gene dosage during development can impact socially motivated behaviours. An increased duration of social contacts in the social investigation test was also seen in the other two published behavioural analyses of *Chd8* heterozygous mouse models (Fig. 2B) (Katayama et al., 2016; Platt et al., 2017). A key characteristic of autism is restricted behaviours or interests, which often manifest as hyper- or hypoactivity to sensory input or unusual interest in sensory stimuli, for example excessive smelling or touching of objects (Constantino and Charman, 2016). One may speculate that



the excessive smelling of social cues observed in our *Chd8*<sup>+/-</sup> mice may be related to these abnormal behaviours.

Our behavioural data beg the question as to whether the *Chd8*<sup>+/-</sup> mouse is a good model for understanding the neurobiological basis of autism. These mice clearly recapitulate several characteristic features of humans with *CHD8* mutations such as mild macrocephaly and hypertelorism, validating this mouse as a model for *CHD8* haploinsufficiency syndrome. However, these mice do not exhibit social deficits, repetitive and restricted behaviours, traits usually taken as providing “face validity” for autism in rodent models (Silverman et al., 2010). Indeed, the cross-species validity of behavioural assays of sociability in species like the mouse where olfaction is the primary social cue, may bear limited relevance to some human ASD subtypes, perhaps exemplified by the *Chd8*<sup>+/-</sup> mouse model. Regardless, the abnormal behaviours exhibited by these mice point to functionally important changes in fundamental brain circuits and neuronal function.

### **Dysregulation of the cortical transcriptome in *Chd8* heterozygous mice.**

*Chd8* levels peak at E12, and gradually decline during embryonic development and into postnatal stages (Durak et al., 2016). Interestingly, our data showed that *Chd8* heterozygosity has little effect on the neocortical transcriptome at E12.5, but widespread transcriptional dysregulation was apparent by early postnatal stages. One possible explanation for this finding could be that the higher absolute levels of *Chd8* at E12.5 are sufficient to maintain normal gene expression even in the heterozygous state, but as *Chd8* levels fall in late embryonic and early postnatal stages the gene dosage provided by a single functional copy of *Chd8* is no longer sufficient to maintain a normal transcriptomic programme. A second possibility is that *Chd8* heterozygosity influences dysregulation of regulatory genes during

early embryogenesis, causing dysregulation of downstream genes, which in turn result in a cascade of differential expression of other genes as development proceeds. In support of this idea, *Chd8* is a known binding partner of  $\beta$ -catenin and regulator of Wnt signalling, a major developmental pathway that plays key roles in specification of cell fate and proliferation (Nishiyama et al., 2012). Furthermore, Katayama and colleagues reported de-repression of REST in the *Chd8* heterozygous brain and reduced expression of neural genes (Katayama et al., 2016). Irrespective of the underlying mechanism, our data identify early postnatal development as a key stage at which transcriptional changes caused by *Chd8* heterozygosity may precipitate ASD-related phenotypes.

An expanding number of ASD risk genes have roles in axon guidance, synapse development and plasticity (Bourgeron, 2015). Intriguingly, we detected significant enrichment of genes in these functional categories in our down-regulated gene set. These include the major Slit protein receptors *Robo1* and *Robo2* (Supplementary tables 3 & 6). Slit proteins are critical for establishing several major axonal tracts in the developing forebrain (Bagri et al., 2002). In addition, down-regulated genes in P5 heterozygous animals were enriched for cell adhesion molecules, including *L1cam*, which has important roles in neuron migration, neurite outgrowth, modulation of actin cytoarchitecture and axon targeting (Maness and Schachner, 2007). Interestingly, Sugathan and colleagues also found enrichment for genes associated with the GO terms ‘cell adhesion’, ‘axon guidance’, ‘neuron differentiation’ and ‘synapse’ in their down-regulated gene set. They conducted RNA-seq analysis on human iPSC-derived neural progenitors, thus suggesting that these important developmental gene sets are regulated by CHD8 at the transcriptional level in both mouse and human cells (Sugathan et al., 2014). Taken together, these findings indicate that *Chd8* heterozygosity defines a transcriptional programme characterised by diminished expression of key

neurodevelopmental regulators that are predicted to affect a complement of cellular functions essential for the appropriate wiring of the brain.

### **Increased functional connectivity in sensory networks**

RsfMRI revealed altered functional connectivity in several cortical networks in *Chd8*<sup>+/-</sup>. It is tempting to speculate that altered connectivity is causally linked to some of the disrupted brain wiring pathways uncovered by our RNA-seq experiments, but this hypothesis will require further in-depth scrutiny. More importantly, it will be critical to investigate whether these connectivity changes are pertinent to any of the behavioural anomalies in *Chd8* heterozygous mice or the ASD phenotype in patients with *CHD8* haploinsufficiency. Intriguingly, we see over-connectivity in networks involving the auditory cortex and the hippocampus. Auditory processing deficits in ASD are well documented and range from a lack of lateralisation to a general delay in network maturation (Bruneau et al., 1992; Edgar et al., 2015), although the functional behavioural consequences of these deficits are not clear. Furthermore, over-responsivity to sensory stimuli is frequently observed in ASD patients, can affect all sensory modalities and appears to be positively correlated with the severity of autistic traits (Tavassoli et al., 2014)(reviewed in Sinclair et al., 2017). Although a definitive causal relationship is difficult to establish, it has been hypothesised that sensory over-responsivity may trigger compensatory and avoidance behaviours that promote the emergence of core behavioural autism traits (Marco et al., 2011). Whether this would be equally the case in ASD mouse models is an open question.

### **Comparison to other ASD mouse models**

To our knowledge, no other ASD mouse model shows the same behavioural complement we describe for *Chd8*<sup>+/-</sup> mice. Of note, however, an *Fmr1* knockout mouse shows increased

active social interactions, including sniffing, in a social interaction test (Spencer et al., 2005). Several genes that are de-repressed in the *Fmr1* knockout mouse are also up-regulated in *CHD8*-deficient human neural stem cells (Sugathan et al., 2014), suggesting some molecular genetic similarities between these two mouse models. However, these similarities do not appear to be recapitulated at the level of functional connectivity, where *Fmr1*<sup>-/-</sup> mice are characterised by long-range under-connectivity (Haberl et al., 2015). A *Shank3* mutant mouse model shows similar hypoactivity when exposed to novel environments (Speed et al., 2015). Intriguingly, the structural brain changes seen in our *Chd8*<sup>+/-</sup> mouse model, in particular the enlarged frontal and cingulate cortex and hippocampus, are also present in *Shank3* and *Fmr1* mutant mice (Ellegood et al., 2015), suggestive of some pathological similarities between these models.

### **Summary and outlook**

Our data provide the first indication that long-range functional connectivity is altered in a *Chd8*<sup>+/-</sup> mouse model. A recent rsfMRI study involving over 150 male probands with an ASD diagnosis and nearly 200 typically developing individuals described over-connectivity between sensory cortices and subcortical structures as a central feature in ASD (Cerliani et al., 2015). It will be very important to determine whether abnormalities similar to those we describe in *Chd8*<sup>+/-</sup> mice are detected in patients with *CHD8* haploinsufficiency. To our knowledge, no other autism mouse model analysed to date has shown the same connectivity changes as we report here. Our finding that a mouse model of an ASD subtype caused by mutations in a high confidence ASD gene presents with a distinct complement of behavioural and connectivity phenotypes, is consistent with the heterogeneity of ASD. Resting state fMRI studies in adults with *CHD8* loss of function mutations will be important to further validate

our findings and contrast these with other human ASD subtypes, with significant implications for patient stratification, diagnosis and treatment.

## METHODS

### *Chd8* gene targeting

A 14.84 kb genomic DNA fragment was subcloned from C57BL/6 BAC clone (RP23:318M20) into pSP72 (Promega). This fragment encompassed a long homology arm (LA) of 9.45kb 5' and a short homology arm (SA) of 4.4kb 3' of the site to be targeted. The targeting construct was generated by inserting a loxP/FRT-PGK-gb2-Neo cassette 214bp 3' of exon 3 (ingenious targeting laboratory (iTTL), Ronkonkoma, NY, USA). An additional single loxP site containing a BclII restriction site for Southern blot screening was inserted 5' of exon 3. The final targeting construct of 18.8 kb was linearised by NotI digestion and electroporated into C57BL/6J ES cells. G418-resistant clones were selected, screened by PCR and Southern blot for successful homologous recombination. Five clones with successful recombination were identified (Figure S1) and two clones (124 and 254) were injected into Balb/c blastocysts (iTTL). Resulting chimaeras were bred with Flpe deleter mice on a C57BL/6J background to excise the neo cassette and produce *Chd8*<sup>lox/+</sup> mice (Figure 1). *Chd8*<sup>lox/+</sup> mice were then crossed with *β-actinCre* mice (Lewandoski and Martin, 1997) to generate a *Chd8* null (*Chd8*<sup>-/-</sup>) allele. *β-actinCre;Chd8*<sup>+/-</sup> mice were crossed with C57BL/6J mice to remove the Cre transgene and establish a *Chd8*<sup>+/-</sup> line.

### Mice

Experimental mice were produced by *Chd8*<sup>+/-</sup> x C57BL/6J crosses, taking care to equalise paternal or maternal inheritance of the *Chd8* null allele, especially for behavioural experiments. For genotyping, genomic DNA was routinely extracted from ear or tail samples (or yolk sac for E12.5 embryos) using Proteinase K digestion or the HotSHOT method (Truett et al., 2000). Genotyping reactions were then performed for the presence of *Chd8* wildtype and null alleles using the following primer pair: FW: CCC ACA TCA AGT GGC

TGT AA, Rev: GGT AGG GAA GCA GTG TCC AG. Thermal cycles for were as follows: 94°C, 5 minutes; 35X (94°C, 30sec; 58°C, 30sec; 72°C, 30sec); 72°C, 5 minutes. This yielded a PCR product of 395bp for the null allele and 1.1kb for the wildtype allele.

### **Western Blot**

Telencephalic vesicles were dissected from E12.5 embryos and whole cell protein prepared by lysing in 8M urea, 1% CHAPS, 50mM Tris (pH 7.9) lysis buffer containing protease inhibitors (PMSF, Pepstatin A, Leupeptin, Aprotinin; Roche) and a phosphatase inhibitor cocktail (Sigma). Lysates were rotated at 4°C for 30 mins followed by DNA removal by centrifugation. Supernatant was transferred to fresh tube and stored at -80°C. Protein loading samples were made by diluting samples in Laemmli buffer containing 10%  $\beta$ -mercaptoethanol, followed by boiling at 95°C for 5 minutes.

Samples were loaded (10 $\mu$ g total protein per lane) onto a Mini-PROTEAN pre-cast gel (Bio-Rad) and resolved using gel electrophoresis. Protein was transferred to a nitrocellulose membrane (Bio-Rad) which was then blocked in 5% non-fat milk powder (Bio-Rad) and 1% bovine serum albumin (BSA, Sigma) in TBS with 0.1% Tween-20 (TBST) for one hour at room temperature, followed by incubation with anti-CHD8 primary antibody (rabbit anti-Chd8 N-terminal, Bethyl Laboratories, 1:5000) in 3% non-fat milk powder and 1% BSA in TBST overnight at 4°C. After washing, membrane was incubated with HRP-conjugated secondary antibody (Millipore) for one hour at room temperature. HRP was detected with Clarity ECL reagent (Bio-Rad) and the membrane imaged using a Bio-Rad ChemiDoc system. The membrane was then washed in TBST and incubated overnight at 4°C in 0.05% sodium azide in PBS, before washing and incubation with anti-GAPDH primary antibody (rabbit anti-GAPDH, Abcam, 1:40000) overnight at 4°C. Membrane was probed with HRP-

conjugate and imaged as before. Relative protein quantity was calculated using Bio-Rad ImageLab software.

### **X-ray Computed tomography**

Fixed heads from adult (26 - 27 days old) *Chd8*<sup>+/-</sup> and *Chd8*<sup>+/+</sup> mice (n=7 of each from two different litters) were scanned using a GE Locus SP microCT scanner. The specimens were immobilised using cotton gauze and scanned to produce 28µm voxel size volumes, using a X-ray tube voltage of 80kVp and a tube current of 80µA. An aluminium filter (0.05mm) was used to adjust the energy distribution of the X-ray source. Reconstructions of computer tomography scans, images and measurements were done in MicroView 2.5.0 software from Parallax Innovations. Each 3D landmark point was recorded, twice for each sample, using the 3D point recording built-in tool within the same software, with the operator blind to the genotypes. The distances between the landmarks were normalised for each sample to the average of the wild-type littermates. Graphics of the plotted data and statistical analysis were performed using GraphPad Prism version 6.0h for Mac OS X (GraphPad Software, La Jolla California USA, [www.graphpad.com](http://www.graphpad.com)). Unpaired student t-tests were applied to analyse the variation between the two groups, for every distance between 2 specific 3D landmark points. Three-dimensional coordinate locations of a total of 22 biological relevant cranial landmarks were chosen based on the landmark list for adult mouse skull proposed by the Richtsmeier lab ([http://getahead.psu.edu/landmarks\\_new.html](http://getahead.psu.edu/landmarks_new.html)) (Hill et al., 2009).

#### **3D LANDMARK POINTS LIST:**

- 1.- Nasale: intersection of nasal bones at midline, rostral point
- 2.- Nasion: intersection of nasal bones at midline, caudal point
- 3.- Bregma: intersection of frontal bones and parietal bones at midline



- 4.- Lambda: intersection of parietal bones with anterior aspect of interparietal bone at midline
- 5.- Intersection of interparietal bones with squamous portion of occipital bone at midline
- 6.- Anterior-most portion at intersection of premaxillae and nasal bones, left side
- 7.- Anterior-most portion at intersection of premaxillae and nasal bones, right side
- 8.- Anterior notch on frontal process lateral to infraorbital fissure, left side
- 9.- Anterior notch on frontal process lateral to infraorbital fissure, right side
- 10.- Frontal-squamosal intersection at temporal crest, left side
- 11.- Frontal-squamosal intersection at temporal crest, right side
- 12.- Joining of squamosal body to zygomatic process of squamosal, left side
- 13.- Joining of squamosal body to zygomatic process of squamosal, right side
- 14.- Intersection of parietal, temporal and interparietal bones, left side
- 15.- Intersection of parietal, temporal and interparietal bones, right side
- 16.- Most anterior point of the anterior palatine foramen, left side
- 17.- Most anterior point of the anterior palatine foramen, right side
- 18.- Most posterior point of the anterior palatine foramen, left side
- 19.- Most posterior point of the anterior palatine foramen, right side
- 20.- Posterior nasal spine, most posterior projection of the posterior nasal spine (palatine bone)
- 21.- Basion: midsagittal point on the anterior margin of the foramen magnum
- 22.- Opisthion: midsagittal point on the posterior margin of the foramen magnum

### **Tissue Collection and Processing**

Pups were weighed and then sacrificed, while embryos were collected by dissection in ice-cold PBS, excess PBS drained and whole embryos weighed. Brains were then dissected from the skull in ice-cold PBS and cut below the brain stem. Brains were then immediately drained

on paper towels using a slotted spoon and wet weights determined using a fine scale. Brains were returned to PBS and wholemount pictures taken on a Nikon SMZ1500 stereo-microscope equipped with a Nikon DS-Fi1 camera head, before post-fixation in 4% PFA at 4°C for 24h. After fixing, embryos were dehydrated and paraffin embedded. Paraffin blocks were then cut into 10µm thick coronal sections and mounted such that each slide contained three adjacent sections.

### *Immunohistochemistry*

Coronal brain sections were re-hydrated using standard protocols. Antigen retrieval was conducted by heating slides in 10mM Sodium Citrate solution (pH6) for 20mins and cooled on ice. Endogenous peroxidases were blocked by incubating in 3% H<sub>2</sub>O<sub>2</sub> and 10% MeOH in PBS for 15mins. Sections were then washed in 0.2% Triton X-100 (Sigma-Aldrich) in PBS (PBT2) for 5 mins and blocked using 10% heat-inactivated normal goat serum (GS) and 2% gelatin in PBT2 for 1 hour. Sections were incubated in 5% GS in PBT2 containing primary antibody (rabbit anti-phosphohistone 3B (Cell Signaling, 1/100)), overnight at 4°C. After incubation with primary antibody, sections were incubated in biotinylated anti-rabbit immunoglobulin secondary antibody (Dako, 1/200) in 5% GS in PBT2. Samples were washed in PBS and incubated with Avidin/biotin complex (ABC, Vector) in PBS for 1 hour. Sections were developed using 0.025% DAB and 0.03% H<sub>2</sub>O<sub>2</sub> in PBS for 10mins before washing in running water and counterstaining using Ehrlich's Hemotoxylin solution. Slides were mounted onto coverslips using DPX (Sigma-Aldrich). Images were acquired on a Nikon 80i microscope equipped with a Nikon 5M pixel Nikon DS digital cameras. Images were processed using Adobe Photoshop and Illustrator.

### *Quantitative Analysis*

Proliferation was quantified by counting phosphohistone 3B-positive cells lining the ventricular surface of the dorsal cortex and normalised to the length of ventricular surface. These were quantified on both sides of the brain in three consecutive sections and averaged to calculate the number of phosphohistone 3B-positive cells per  $\mu\text{m}$  of ventricular surface in the dorsal cortex. All data were analysed using GraphPad Prism 6 and significance calculated using student's t-test.

### **Behavioural assessments**

Mice for behavioural testing were housed in standard cages measuring 32×16×14cm with sawdust (Litaspen premium, Datesand Ltd, Manchester), a cardboard shelter and additional bedding material (Sizzlenest, Datesand Ltd, Manchester) with *ad libitum* access to water and food (Rat and Mouse No. 1 and 3 Maintenance Diet for test and breeding mice respectively, Special Diet Services, Essex, UK). The housing and test rooms were maintained at constant room temperature (21°C) and humidity (45%) and kept under a regular light/dark schedule with lights on from 07:30 to 19:30 hours (light = 270 lux).

Behavioural experiments were conducted between 08:30 and 18:30 in sound-proofed rooms under standard room lighting unless stated otherwise. Behaviours were recorded using a camera positioned above and/or on the side of the test arenas and movement of each mouse tracked using EthoVision (Noldus Information Technologies bv, Wageningen, The Netherlands), or scored manually using Matlab (version 8.5). For automated analyses of the animals' behaviour using Ethovision the following were recorded and analysed: The mean velocity (cm/s) and total distance (cm) travelled in different compartments of the arena, the latency (s) to enter different parts of the arena(s) and duration (s) in each compartment.

After each individual trial of a specific test, boli and urine were removed from the test arena which was cleaned with 1% Anistel® solution (high level surface disinfectant, Trisel Solution Ltd, Cambridgeshire, UK) to remove any odours. Experimenters were blind to the genotype of the animals both during the testing and subsequent scoring of the recorded behaviours.

Different batches of mice were used for (i) recording pup USVs and spontaneous motor behaviours, and (ii) juvenile and adult behaviours. For the first batch of mice, paw tattoos were administered, immediately after testing on P2, to allow for identification of pups prior to ear notching. All batches of mice were ear notched for permanent identification at P14 and housed in same-sex groups of 2-3 after weaning (P21). For juvenile-adult behaviours tests were carried out in the following order: juvenile social investigation, rotarod, grip strength, open field, self-grooming, marble burying, adult social investigation, 3 chamber social approach, light/dark test, olfactory habituation/dishabituation and Morris water maze.

One week before performing the rotarod test, mice were singly-housed to avoid any potential confounds from social and aggressive behaviour hierarchies, which could influence the controlled assessment of social behaviours (Brown, 1953). Sawdust was changed every other week but never on the day before, or the day of, testing and the enrichment (nesting material and house) was changed less regularly to minimize the disruption to the animals. For all social tests, conspecific mice were housed in a separate room to the test mice to ensure the conspecifics were unfamiliar to the test mice. Test mice were never exposed to the same conspecific during testing to ensure novelty.

*Ultrasonic vocalisations (USVs) in response to maternal & nest separation:* USVs and

spontaneous motor behaviours were recorded in pups across 3min sessions in response to social separation from the mother and siblings at P2, 4, 6, 8 and 12, as described previously (39, 40). An ultrasound microphone (Avisoft UltraSoundGate condenser microphone capsule CM16, Avisoft Bioacoustics, Berlin, Germany), sensitive to frequencies of 10–180 kHz, was placed through a hole in the middle of the cover of the sound-attenuating box, approximately 20 cm above the pup which was placed in a glass cup. Vocalisations were recorded using Avisoft Recorder software (Version 3.2). For acoustical analysis, recordings were transferred to Avisoft SASLab Pro (Version 4.40) and a fast fourier transformation (FFT) was conducted. Spectrograms were generated at a frequency resolution of 488 Hz and a time resolution of 1ms. The number of calls for each day of testing were analysed to define the ontogenetic profile of emission in control mutant pups.

*Juvenile social investigation:* Social investigation of age- and sex-matched C57BL/6J conspecifics was assessed in juvenile test mice (P20-P22) as described (Yang et al., 2007), with the exception that mice were not habituated to the test room and behaviours only recorded for 15 minutes. Test and conspecific animals were singly-housed 1 hour prior to testing in a clean standard housing cage with sawdust, but no other enrichment and with ad libitum access to food and water. Test mice were placed into a new standard housing cage containing sawdust and the conspecific animal was introduced to the test cage. Mice were allowed to interact for 15 minutes and behaviour recorded. The following behaviours (frequency and duration in s) initiated by the test mouse were scored: anogenital sniffing (direct contact with the anogenital area), body sniffing (sniffing or snout contact with the flank area), head sniffing (sniffing or snout contact with the head/neck/mouth area). No observations of mounting, fighting, tail rattling, and wrestling behaviours were observed. The test room was dimly lit (10 lux).

*Rotarod:* Motor coordination and learning were assessed on a rotating rod (Ugo Basile, Milan, Italy) as described (Wohr et al., 2013), with the exception that the maximum speed was set to 30rpm. The latency to fall for any particular day was calculated as the mean of 2 trials.

*Grip Strength:* To assess the neuromuscular ability of the animals, fore- and hindlimb grip strength was measured using a Linton Grip Strength Meter (MJS Technology Ltd, Stevenage UK). Fore- and hindlimb grip strength was measured 3 times and the mean grip strength of the 3 trials reported (Whittemore et al., 2003).

*Open field:* Mice were placed facing the wall of a circular open field arena (40 cm diameter) and allowed to freely explore for 10 min. An area of equal distance from the periphery (20 cm diameter), defined as the ‘central zone’ which is assumed to be the more anxiolytic part of the arena, was virtually drawn in Ethovision.

*Self-grooming:* This test was carried out as described (McFarlane et al., 2008). The animals were placed in an empty standard housing cage and given 10 minutes to habituate in a dimly lit test room (< 10 lux). The cumulative time spent self-grooming in the following 10 minutes was recorded by an experimenter.

*Marble burying:* Repetitive digging behaviour to bury marbles was measured, as described by Deacon, 2006 (Deacon, 2006). Repetitive digging behaviour to bury marbles was measured in a dimly lit test room (< 10 lux). Twelve blue glass marbles were arranged in a symmetrical 4×3cm grid on top of 5 cm deep sawdust) in a clean, standard housing cage. Each mouse was given 30min to freely explore the cage. Eight mice were tested

simultaneously and the number of marbles buried at 2.5, 5, 7.5, 10, 20 and 30 min intervals were counted by the experimenter.

*Adult social investigation:* Social investigation of test mice in response to C57BL/6J sex-matched conspecifics were assessed in adulthood. Test mice were placed into a new standard housing cage containing sawdust and a novel, sex-matched conspecific C57BL/6J mouse introduced to the test cage. The test room was dimly lit (10 lux). Mice were allowed to interact for 3 minutes and the behaviour was recorded and scored as described for juvenile social investigation test.

*Light/dark box:* a custom-built box of grey acrylic was used with dimensions (44 x 21 x 21 cm). The box was divided into two chambers by a sheet of grey acrylic (21 x 50 cm); a smaller dark chamber (20 lux) that occupied roughly 1/3 of the total box, and a larger lit chamber (80-110 lux) that was lit from above with a bright white light. A small doorway (5 x 7 cm) within the partition allowed the mice to move between chambers freely. Mice were placed in the dark compartment at the start of the 5-min trial. Entry to either compartment was defined as when all four paws of the mouse had entered in one compartment.

*3 Chamber social approach:* This task was essentially carried out as described (Yang et al., 2011), with 2 alterations: (1) the chamber was not automated and instead Ethovision was used to track the activity of the test mouse and (2) a novel object (tally counter, Appleton Woods GC101) was placed under the cup in trial 2. The mice were allowed to freely explore the three-chamber apparatus over two 10 min trials. During trial 1, the apparatus was empty and the locomotor activity of the test mouse was tracked using Ethovision. In trial 2, one wired cup containing the inanimate object was placed upside down in one of the side

chambers (novel object stimulus) and a novel age and sex-matched conspecific mouse was placed under another wire cup in the other side chamber (novel mouse stimulus), leaving the middle chamber empty. The location of the novel mouse across trials was counterbalanced to minimise any potential confound due to a preference for chamber location.

*Olfactory habituation/dishabituation test:* This task was essentially carried out as described (Yang and Crawley, 2009). Animals were tested in their home cage, with all the enrichment removed and a fresh cage lid provided just before the trial commenced to minimise the amount of interfering odours (the cage of each mouse was cleaned 3 days prior to testing). Following a 10 min habituation, the mouse was exposed to three odours in turn: water (control/no odor; 50 $\mu$ l), banana essence (non-social; 50 $\mu$ l; Uncle Roy's, Moffat, UK) and urine collected from novel, sex-matched conspecific mice (social, 25 $\mu$ l), each presented on a cotton-tipped wooden applicator 3 times over 2 minutes. Total time (s) spent by the mouse sniffing the cotton buds during each trial was recorded.

#### *General activity measurements*

General activity was measured using a running wheel paradigm. Mice were housed individually under a 12h:12h light-dark cycle (lights on at 8am; lights off at 8pm) in a light-, air-, temperature-controlled ventilated cabinet (Arrowmigh, Hereford, UK). Running-wheel cages were equipped with an infrared sensor (Bilaney consultant Ltd, Sevenoaks, UK) connected to a computer. Data were collected in 1-min bins using Clocklab software (Actimetrics, Inc, Wilmette, IL, USA). Mice were continuously monitored undisturbed from the day they were placed in the running wheel cages and their general activity during the light versus dark phase were compared over the first 7 days. Since male and female mice did not show any statistical significant sex difference, data were pooled.



*Morris Water Maze:* This task was carried out as described (Grayton et al., 2013) with the exception that the pool was 100 cm in diameter and that 8 hidden and 6 reversal trials were performed. Latency to reach the platform was manually scored for each mouse by an experiment blind to the genotype of the mouse and path length (cm) to reach the platform and speed (cm/s) were extracted from Ethovision. Mean latencies (s) and path lengths (cm) were calculated across the trials within each session for each mouse. To assess the retention of spatial memory, the time spent in the quadrant that had contained the platform (target quadrant) compared to the other quadrants was measured. Conflicting behavioral responses such as floating or thigmotaxis (the amount of time spent swimming in the outer area of the pool defined as a 15 cm wide circular zone adjacent to the wall of the maze) were assessed throughout the trials.

*Statistical analysis:* All statistical analyses were conducted using SPSS (Version 22 (IBM, Version Armonk, USA). Data were analysed using either a between-subjects ANOVA or a 2-way repeated measures ANOVA, as appropriate. If there was no statistically significant sex difference, data were pooled. When the appropriate ANOVA showed a significant effect for a particular task, student's t-tests were used as post-hoc analyses, as there were only 2 groups for comparison.

### **Structural MRI**

After completion of adult behavioural tests, mice were terminally anesthetized and intracardially perfused with 30mL of 0.1M PBS containing 10U/mL heparin (Sigma) and 2mM ProHance (a Gadolinium contrast agent) followed by 30mL of 4% paraformaldehyde (PFA) containing 2mM ProHance (Spring et al., 2007). Perfusions were performed at a rate of approximately 60mL/hr. After perfusion, mice were decapitated. The brain and remaining

skull structures were incubated in 4% PFA + 2mM ProHance overnight at 4°C then transferred to 0.1M PBS containing 2mM ProHance and 0.02% sodium azide for at least 7 days prior to MRI scanning. A multi-channel 7.0 Tesla MRI scanner (Varian Inc., Palo Alto, CA) was used to image the brains within skulls. Sixteen custom-built solenoid coils were used to image the brains in parallel (Bock et al., 2005). Parameters used in the anatomical MRI scans: T2- weighted 3D fast spin-echo sequence, with a cylindrical acquisition of k-space, and with a TR of 350 ms, and TEs of 12 ms per echo for 6 echoes, two averages, field-of-view of 20 x 20 x 25 mm<sup>3</sup> and matrix size = 504 x 504 x 630 giving an image with 0.040 mm isotropic voxels (Lerch et al., 2011). The current scan time required for this sequence is ~14 hours. To visualise and compare any changes in the mouse brains the images were linearly (6 parameter followed by a 12 parameter) and non-linearly registered towards a pre-existing atlas (Dorr et al., 2008), and then iteratively linearly and non-linearly aligned to each other to create a population atlas representing the average anatomy of the study sample. The result of the registration is to have all scans deformed into alignment with each other in an unbiased fashion. This allows for the analysis of the deformations needed to take each individual mouse's anatomy into this final atlas space, the goal being to model how the deformation fields relate to genotype (Lerch et al., 2008; Nieman et al., 2006). The jacobian determinants of the deformation fields were then calculated as measures of volume at each voxel. Significant volume changes were then calculated in two ways, 1) on a region basis, and 2) voxelwise. Regional volumes are calculated by warping a pre-existing classified MRI atlas onto the population atlas. This atlas encompasses 159 different structures including, but not limited to, the cortical lobes, large white matter structures (i.e. corpus callosum), ventricles, cerebellum, brain stem, and olfactory bulbs (Dorr et al., 2008; Steadman et al., 2014; Ullmann et al., 2013). Significant differences can then be determined between groups for the 159 different regions in the brain. Voxelwise comparisons were made between

mutants and littermate controls. Voxelwise comparisons were then made between mutants and wildtypes, and multiple comparisons in this study were controlled for using the False Discovery Rate (Genovese et al., 2002).

### **RNA Extraction and qRT-PCR analysis.**

To extract RNA, dissected cortices were lysed in 600 $\mu$ l Trizol (Life Technologies). RNA was then purified and DNase treated using the Direct-zol RNA MiniPrep kit (Zymo Research) according to the manufacturer's instructions. For qRT-PCR, cDNA was synthesized using 50ng RNA from 4 biological replicates per condition with the Precision nanoScript 2 Reverse Transcription Kit (PrimerDesign Ltd.) according to the manufacturer's recommendations. qRT-PCRs were performed on a Stratagene Mx3000p (Agilent Technologies) using PrecisionPlus-MX 2x qPCR Mastermix with SYBR green (PrimerDesign Ltd.) and primers against *Chd8* (FW: CAG AGG AGG AGG GTG AAA AGA AAC, Rev: GAG TTG TCA GAC GAT GTG TTA CGC). *Canx* and *Sdha* (E12.5) and *Gapdh* and *Eifa* (P5) were used as endogenous control genes as determined by prior geNorm (Primerdesign, UK) analysis for the respective sample sets, and relative expression levels were calculated using the  $2^{-\Delta\Delta CT}$  method.

### **RNA Sequencing**

For RNA-sequencing mRNA was isolated from micro-dissected cortices at E12.5 (both hemispheres) and P5 (one hemisphere) and reverse transcribed into cDNA (n=3 per experimental group). cDNA was end-repaired, adaptor-ligated and A-tailed. Paired-end sequencing was performed on the Illumina HiSeq 4000 platform. Quality of the raw sequencing data was checked using FastQC version 0.11.2 and trimming of adaptor sequences was performed using Trim Galore! version 0.4.1 (Krueger 2012; Andrews 2010).

Reads were aligned to the mouse genome (GRCm38.p4) using Tophat version 2.1.0 and aligned reads were counted using FeatureCounts version 1.5.0 (Liao et al. 2014; Kim et al. 2013). Differential expression testing was performed using DESeq2 version 1.10.1, as previously described (Love et al. 2014). Gene ontology analysis and functional classification was performed using DAVID with all detected DEGs below a 0.05 FDR (Huang et al. 2009). Putative regulatory transcription factors were determined using Enrichr using the “ENCODE and ChEA Consensus TFs from ChIP-X” database with all DEGs below a 0.05 FDR (Chen et al. 2013). The R package ggplot2 version 2.1.0 was used to generate volcano plots and DESeq2 normalised read count plots for individual genes. The list of ASD associated genes used for overlap with P5 DEGs was obtained from the SFARI Human Gene database ([https://gene.sfari.org/autdb/HG\\_Home.do](https://gene.sfari.org/autdb/HG_Home.do)). RNA-seq data have been deposited into GEO, accession number GSE81103.

### **Resting-State fMRI**

rsfMRI experiments were performed on 15-18 week old mice (n = 23 *Chd8*<sup>+/+</sup>; n = 19 *Chd8*<sup>+/-</sup>). Animals were prepared for imaging as previously described (Ferrari et al. 2012; Sforazzini et al. 2016). Briefly, mice were anaesthetised using isoflurane (5% induction), intubated and artificially ventilated (2% maintenance). Blood pressure was monitored continuously by cannulating the left femoral artery, also allowing for terminal arterial blood sampling. Administration of isoflurane was ceased after surgery and substituted with halothane (0.75%). 45 mins after isoflurane cessation functional data acquisition commenced. Throughout each imaging session mean arterial blood pressure was recorded continuously. In vivo images were obtained using a 7.0 T MRI scanner (Bruker Biospin, Milan), as previously described (Liska et al. 2016). Signal transmission and reception were achieved using a 72mm birdcage transmit coil and a 4-channel solenoid coil. For each session, high

resolution anatomical images were acquired using a fast spin echo sequence based on the following parameters: repetition time (TR)/echo time (TE) 5500/60ms, matrix 192 x 192, field of view 2 x 2cm<sup>3</sup>, 24 coronal slices, and slice thickness 0.50mm. Co-centred BOLD rsfMRI time series were acquired using an echo planar imaging (EPI) sequence with the following parameters: TR/TE 1200/15ms, flip angle 30°, matrix 100 x 100, field of views 2 x 2cm<sup>2</sup>, 24 coronal slices, slice thickness 0.50mm, 500 volumes and 10min total acquisition time. MRI raw data, templates and code employed to generate functional maps are available to readers by contacting AG.

### *Functional Connectivity Analyses*

To allow for T<sub>1</sub> equilibration effects, the first 20 volumes of rsfMRI data were removed. The time series were then despiked, corrected for motion and spatially normalised to an in-house mouse brain template (Sforazzini et al., 2014). Normalised data had a spatial resolution of 0.1042 x 0.1042 x 0.5mm<sup>3</sup> (192 x 192 x 24 matrix). Mean ventricular signal (averaged rsfMRI time course within a reference ventricular mask) and head motion traces were regressed out of each time series. No genotype-dependent differences were observed in ventricular volume, as measured by the dimensions of individual ventricular masks. All rsfMRI time series were then spatially smoothed (full width at half maximum of 0.6mm) and band-pass filtered using a frequency window of 0.01-0.1Hz.

To identify brain regions displaying genotype-dependent differences in functional connectivity in an unbiased manner, we calculated global rsfMRI connectivity maps for all subjects, as described previously in detail (Liska et al., 2017; Liska et al., 2015). A previously described seed-based approach was then used to examine between-group differences in the intensity and scope of long-range rsfMRI correlation networks (Sforazzini et al., 2016).

## ACKNOWLEDGEMENTS

This work was supported by research grants from the Medical Research Council (MR/K022377/1, MAB and CF), Simons Foundation (SFARI #344763, MAB; SFARI #400101, AG), Ontario Brain Institute's POND programme (JPL), and BBSRC (BB/K008668/1, PFW). SH and RE were supported by the King's Bioscience Institute and the Guy's and St Thomas' Charity Prize PhD Programme in Biomedical and Translational Science. AG was supported by a 2017 NARSAD Independent Investigator Grant from the Brain and Behavior Research Foundation. We thank John Whittingham, Alex Donovan and BSU staff for technical assistance and Chris Healy for  $\mu$ CT scans. We acknowledge the High-Throughput Genomics Group at the Wellcome Trust Centre for Human Genetics (funded by Wellcome Trust grant reference 090532/Z/09/Z) for the generation of the RNA sequencing data and Drs. Brian Nieman and Leigh Spencer Noakes for their MRI sequences.

## REFERENCES

- APA (2013). Diagnostic and statistical manual of mental disorders, 5th edn (Arlington, VA: American Psychiatric Publishing).
- Bagri, A., Marin, O., Plump, A.S., Mak, J., Pleasure, S.J., Rubenstein, J.L., and Tessier-Lavigne, M. (2002). Slit proteins prevent midline crossing and determine the dorsoventral position of major axonal pathways in the mammalian forebrain. *Neuron* 33, 233-248.
- Barnard, R.A., Pomaville, M.B., and O'Roak, B.J. (2015). Mutations and Modeling of the Chromatin Remodeler CHD8 Define an Emerging Autism Etiology. *Front Neurosci* 9, 477.
- Belmonte, M.K., Allen, G., Beckel-Mitchener, A., Boulanger, L.M., Carper, R.A., and Webb, S.J. (2004). Autism and abnormal development of brain connectivity. *The Journal of neuroscience : the official journal of the Society for Neuroscience* 24, 9228-9231.
- Bernier, R., Golzio, C., Xiong, B., Stessman, H.A., Coe, B.P., Penn, O., Witherspoon, K., Gerds, J., Baker, C., Vulto-van Silfhout, A.T., *et al.* (2014). Disruptive CHD8 mutations define a subtype of autism early in development. *Cell* 158, 263-276.
- Blatt, G.J. (2012). The neuropathology of autism. *Scientifica (Cairo)* 2012, 703675.
- Bock, N.A., Nieman, B.J., Bishop, J.B., and Mark Henkelman, R. (2005). In vivo multiple-mouse MRI at 7 Tesla. *Magn Reson Med* 54, 1311-1316.
- Bourgeron, T. (2015). From the genetic architecture to synaptic plasticity in autism spectrum disorder. *Nat Rev Neurosci* 16, 551-563.
- Brown, R.Z. (1953). Social behaviour, reproduction and population changes in the house mouse. *Ecol Monogr* 23, 217-240.
- Bruneau, N., Dourneau, M.C., Garreau, B., Pourcelot, L., and Lelord, G. (1992). Blood flow response to auditory stimulations in normal, mentally retarded, and autistic children: a preliminary transcranial Doppler ultrasonographic study of the middle cerebral arteries. *Biological psychiatry* 32, 691-699.
- Cao, R., and Zhang, Y. (2004). SUZ12 is required for both the histone methyltransferase activity and the silencing function of the EED-EZH2 complex. *Molecular cell* 15, 57-67.
- Cerliani, L., Mennes, M., Thomas, R.M., Di Martino, A., Thioux, M., and Keyser, C. (2015). Increased Functional Connectivity Between Subcortical and Cortical Resting-State Networks in Autism Spectrum Disorder. *JAMA psychiatry* 72, 767-777.
- Cherkassky, V.L., Kana, R.K., Keller, T.A., and Just, M.A. (2006). Functional connectivity in a baseline resting-state network in autism. *Neuroreport* 17, 1687-1690.
- Constantino, J.N., and Charman, T. (2016). Diagnosis of autism spectrum disorder: reconciling the syndrome, its diverse origins, and variation in expression. *Lancet Neurol* 15, 279-291.
- Cotney, J., Muhle, R.A., Sanders, S.J., Liu, L., Willsey, A.J., Niu, W., Liu, W., Klei, L., Lei, J., Yin, J., *et al.* (2015). The autism-associated chromatin modifier CHD8 regulates other autism risk genes during human neurodevelopment. *Nature communications* 6, 6404.
- Croen, L.A., Zerbo, O., Qian, Y., Massolo, M.L., Rich, S., Sidney, S., and Kripke, C. (2015). The health status of adults on the autism spectrum. *Autism : the international journal of research and practice* 19, 814-823.
- Deacon, R.M. (2006). Digging and marble burying in mice: simple methods for in vivo identification of biological impacts. *Nature protocols* 1, 122-124.
- Di Martino, A., Yan, C.G., Li, Q., Denio, E., Castellanos, F.X., Alaerts, K., Anderson, J.S., Assaf, M., Bookheimer, S.Y., Dapretto, M., *et al.* (2014). The autism brain imaging data exchange: towards a large-scale evaluation of the intrinsic brain architecture in autism. *Molecular psychiatry* 19, 659-667.
- Donovan, A.P., and Basson, M.A. (2017). The neuroanatomy of autism - a developmental perspective. *J Anat* 230, 4-15.

- Dorr, A.E., Lerch, J.P., Spring, S., Kabani, N., and Henkelman, R.M. (2008). High resolution three-dimensional brain atlas using an average magnetic resonance image of 40 adult C57Bl/6J mice. *NeuroImage* 42, 60-69.
- Durak, O., Gao, F., Kaeser-Woo, Y.J., Rueda, R., Martorell, A.J., Nott, A., Liu, C.Y., Watson, L.A., and Tsai, L.H. (2016). Chd8 mediates cortical neurogenesis via transcriptional regulation of cell cycle and Wnt signaling. *Nat Neurosci*.
- Ecker, C. (2016). The neuroanatomy of autism spectrum disorder: An overview of structural neuroimaging findings and their translatability to the clinical setting. *Autism*.
- Edgar, J.C., Fisk Iv, C.L., Berman, J.I., Chudnovskaya, D., Liu, S., Pandey, J., Herrington, J.D., Port, R.G., Schultz, R.T., and Roberts, T.P. (2015). Auditory encoding abnormalities in children with autism spectrum disorder suggest delayed development of auditory cortex. *Molecular autism* 6, 69.
- Ellegood, J., Anagnostou, E., Babineau, B.A., Crawley, J.N., Lin, L., Genestine, M., DiCicco-Bloom, E., Lai, J.K., Foster, J.A., Penagarikano, O., *et al.* (2015). Clustering autism: using neuroanatomical differences in 26 mouse models to gain insight into the heterogeneity. *Mol Psychiatry* 20, 118-125.
- Genovese, C.R., Lazar, N.A., and Nichols, T. (2002). Thresholding of statistical maps in functional neuroimaging using the false discovery rate. *NeuroImage* 15, 870-878.
- Grayton, H.M., Missler, M., Collier, D.A., and Fernandes, C. (2013). Altered social behaviours in neurexin 1alpha knockout mice resemble core symptoms in neurodevelopmental disorders. *PLoS One* 8, e67114.
- Haberl, M.G., Zerbi, V., Veltien, A., Ginger, M., Heerschap, A., and Frick, A. (2015). Structural-functional connectivity deficits of neocortical circuits in the Fmr1 (-/y) mouse model of autism. *Science advances* 1, e1500775.
- Hill, C.A., Sussan, T.E., Reeves, R.H., and Richtsmeier, J.T. (2009). Complex contributions of Ets2 to craniofacial and thymus phenotypes of trisomic "Down syndrome" mice. *Am J Med Genet A* 149A, 2158-2165.
- Iossifov, I., O'Roak, B.J., Sanders, S.J., Ronemus, M., Krumm, N., Levy, D., Stessman, H.A., Witherspoon, K.T., Vives, L., Patterson, K.E., *et al.* (2014). The contribution of de novo coding mutations to autism spectrum disorder. *Nature* 515, 216-221.
- Jeste, S.S., and Tuchman, R. (2015). Autism Spectrum Disorder and Epilepsy: Two Sides of the Same Coin? *Journal of child neurology* 30, 1963-1971.
- Just, M.A., Cherkassky, V.L., Keller, T.A., and Minshew, N.J. (2004). Cortical activation and synchronization during sentence comprehension in high-functioning autism: evidence of underconnectivity. *Brain : a journal of neurology* 127, 1811-1821.
- Katayama, Y., Nishiyama, M., Shoji, H., Ohkawa, Y., Kawamura, A., Sato, T., Suyama, M., Takumi, T., Miyakawa, T., and Nakayama, K.I. (2016). CHD8 haploinsufficiency results in autistic-like phenotypes in mice. *Nature* 537, 675-679.
- Lane, A.E., Molloy, C.A., and Bishop, S.L. (2014). Classification of children with autism spectrum disorder by sensory subtype: a case for sensory-based phenotypes. *Autism research : official journal of the International Society for Autism Research* 7, 322-333.
- Lerch, J.P., Carroll, J.B., Spring, S., Bertram, L.N., Schwab, C., Hayden, M.R., and Henkelman, R.M. (2008). Automated deformation analysis in the YAC128 Huntington disease mouse model. *NeuroImage* 39, 32-39.
- Lerch, J.P., Sled, J.G., and Henkelman, R.M. (2011). MRI phenotyping of genetically altered mice. *Methods Mol Biol* 711, 349-361.
- Lewandoski, M., and Martin, G.R. (1997). Cre-mediated chromosome loss in mice. *Nat Genet* 17, 223-225.
- Liska, A., Bertero, A., Gomolka, R., Sabbioni, M., Galbusera, A., Barsotti, N., Panzeri, S., Scattoni, M.L., Pasqualetti, M., and Gozzi, A. (2017). Homozygous Loss of Autism-Risk



Gene CNTNAP2 Results in Reduced Local and Long-Range Prefrontal Functional Connectivity. *Cereb Cortex*, 1-13.

Liska, A., Galbusera, A., Schwarz, A.J., and Gozzi, A. (2015). Functional connectivity hubs of the mouse brain. *NeuroImage* 115, 281-291.

Liska, A., and Gozzi, A. (2016). Can Mouse Imaging Studies Bring Order to Autism Connectivity Chaos? *Front Neurosci* 10, 484.

Maness, P.F., and Schachner, M. (2007). Neural recognition molecules of the immunoglobulin superfamily: signaling transducers of axon guidance and neuronal migration. *Nature neuroscience* 10, 19-26.

Marco, E.J., Hinkley, L.B., Hill, S.S., and Nagarajan, S.S. (2011). Sensory processing in autism: a review of neurophysiologic findings. *Pediatr Res* 69, 48R-54R.

McFarlane, H.G., Kusek, G.K., Yang, M., Phoenix, J.L., Bolivar, V.J., and Crawley, J.N. (2008). Autism-like behavioral phenotypes in BTBR T+tf/J mice. *Genes, brain, and behavior* 7, 152-163.

Merner, N., Forgeot d'Arc, B., Bell, S.C., Maussion, G., Peng, H., Gauthier, J., Crapper, L., Hamdan, F.F., Michaud, J.L., Mottron, L., *et al.* (2016). A de novo frameshift mutation in chromodomain helicase DNA-binding domain 8 (CHD8): A case report and literature review. *Am J Med Genet A*.

Neale, B.M., Kou, Y., Liu, L., Ma'ayan, A., Samocha, K.E., Sabo, A., Lin, C.F., Stevens, C., Wang, L.S., Makarov, V., *et al.* (2012). Patterns and rates of exonic de novo mutations in autism spectrum disorders. *Nature* 485, 242-245.

Nieman, B.J., Flenniken, A.M., Adamson, S.L., Henkelman, R.M., and Sled, J.G. (2006). Anatomical phenotyping in the brain and skull of a mutant mouse by magnetic resonance imaging and computed tomography. *Physiol Genomics* 24, 154-162.

Nishiyama, M., Skoultschi, A.I., and Nakayama, K.I. (2012). Histone H1 recruitment by CHD8 is essential for suppression of the Wnt-beta-catenin signaling pathway. *Mol Cell Biol* 32, 501-512.

O'Roak, B.J., Stessman, H.A., Boyle, E.A., Witherspoon, K.T., Martin, B., Lee, C., Vives, L., Baker, C., Hiatt, J.B., Nickerson, D.A., *et al.* (2014). Recurrent de novo mutations implicate novel genes underlying simplex autism risk. *Nature communications* 5, 5595.

O'Roak, B.J., Vives, L., Fu, W., Egertson, J.D., Stanaway, I.B., Phelps, I.G., Carvill, G., Kumar, A., Lee, C., Ankenman, K., *et al.* (2012a). Multiplex targeted sequencing identifies recurrently mutated genes in autism spectrum disorders. *Science* 338, 1619-1622.

O'Roak, B.J., Vives, L., Girirajan, S., Karakoc, E., Krumm, N., Coe, B.P., Levy, R., Ko, A., Lee, C., Smith, J.D., *et al.* (2012b). Sporadic autism exomes reveal a highly interconnected protein network of de novo mutations. *Nature* 485, 246-250.

Picci, G., Gotts, S.J., and Scherf, K.S. (2016). A theoretical rut: revisiting and critically evaluating the generalized under/over-connectivity hypothesis of autism. *Developmental science* 19, 524-549.

Platt, R.J., Zhou, Y., Slaymaker, I.M., Shetty, A.S., Weisbach, N.R., Kim, J.A., Sharma, J., Desai, M., Sood, S., Kempton, H.R., *et al.* (2017). Chd8 Mutation Leads to Autistic-like Behaviors and Impaired Striatal Circuits. *Cell reports* 19, 335-350.

Scott-Van Zeeland, A.A., Abrahams, B.S., Alvarez-Retuerto, A.I., Sonnenblick, L.I., Rudie, J.D., Ghahremani, D., Mumford, J.A., Poldrack, R.A., Dapretto, M., Geschwind, D.H., *et al.* (2010). Altered functional connectivity in frontal lobe circuits is associated with variation in the autism risk gene CNTNAP2. *Sci Transl Med* 2, 56ra80.

Sforazzini, F., Bertero, A., Dodero, L., David, G., Galbusera, A., Scattoni, M.L., Pasqualetti, M., and Gozzi, A. (2016). Altered functional connectivity networks in acallosal and socially impaired BTBR mice. *Brain structure & function* 221, 941-954.

- Sforazzini, F., Schwarz, A.J., Galbusera, A., Bifone, A., and Gozzi, A. (2014). Distributed BOLD and CBV-weighted resting-state networks in the mouse brain. *NeuroImage* 87, 403-415.
- Silverman, J.L., Yang, M., Lord, C., and Crawley, J.N. (2010). Behavioural phenotyping assays for mouse models of autism. *Nat Rev Neurosci* 11, 490-502.
- Sinclair, D., Oranje, B., Razak, K.A., Siegel, S.J., and Schmid, S. (2017). Sensory processing in autism spectrum disorders and Fragile X syndrome-From the clinic to animal models. *Neuroscience and biobehavioral reviews* 76, 235-253.
- Speed, H.E., Kouser, M., Xuan, Z., Reimers, J.M., Ochoa, C.F., Gupta, N., Liu, S., and Powell, C.M. (2015). Autism-Associated Insertion Mutation (InsG) of Shank3 Exon 21 Causes Impaired Synaptic Transmission and Behavioral Deficits. *J Neurosci* 35, 9648-9665.
- Spencer, C.M., Alekseyenko, O., Serysheva, E., Yuva-Paylor, L.A., and Paylor, R. (2005). Altered anxiety-related and social behaviors in the Fmr1 knockout mouse model of fragile X syndrome. *Genes, brain, and behavior* 4, 420-430.
- Spring, S., Lerch, J.P., and Henkelman, R.M. (2007). Sexual dimorphism revealed in the structure of the mouse brain using three-dimensional magnetic resonance imaging. *NeuroImage* 35, 1424-1433.
- Steadman, P.E., Ellegood, J., Szulc, K.U., Turnbull, D.H., Joyner, A.L., Henkelman, R.M., and Lerch, J.P. (2014). Genetic effects on cerebellar structure across mouse models of autism using a magnetic resonance imaging atlas. *Autism research : official journal of the International Society for Autism Research* 7, 124-137.
- Stessman, H.A., Xiong, B., Coe, B.P., Wang, T., Hoekzema, K., Fenckova, M., Kvarnung, M., Gerdt, J., Trinh, S., Cosemans, N., *et al.* (2017). Targeted sequencing identifies 91 neurodevelopmental-disorder risk genes with autism and developmental-disability biases. *Nature genetics* 49, 515-526.
- Stolerman, E.S., Smith, B., Chaubey, A., and Jones, J.R. (2016). CHD8 intragenic deletion associated with autism spectrum disorder. *Eur J Med Genet* 59, 189-194.
- Sugathan, A., Biagioli, M., Golzio, C., Erdin, S., Blumenthal, I., Manavalan, P., Ragavendran, A., Brand, H., Lucente, D., Miles, J., *et al.* (2014). CHD8 regulates neurodevelopmental pathways associated with autism spectrum disorder in neural progenitors. *Proc Natl Acad Sci U S A* 111, E4468-4477.
- Talkowski, M.E., Rosenfeld, J.A., Blumenthal, I., Pillalamarri, V., Chiang, C., Heilbut, A., Ernst, C., Hanscom, C., Rossin, E., Lindgren, A.M., *et al.* (2012). Sequencing chromosomal abnormalities reveals neurodevelopmental loci that confer risk across diagnostic boundaries. *Cell* 149, 525-537.
- Tavassoli, T., Miller, L.J., Schoen, S.A., Nielsen, D.M., and Baron-Cohen, S. (2014). Sensory over-responsivity in adults with autism spectrum conditions. *Autism : the international journal of research and practice* 18, 428-432.
- Thompson, B.A., Tremblay, V., Lin, G., and Bochar, D.A. (2008). CHD8 is an ATP-dependent chromatin remodeling factor that regulates beta-catenin target genes. *Mol Cell Biol* 28, 3894-3904.
- Truett, G.E., Heeger, P., Mynatt, R.L., Truett, A.A., Walker, J.A., and Warman, M.L. (2000). Preparation of PCR-quality mouse genomic DNA with hot sodium hydroxide and tris (HotSHOT). *Biotechniques* 29, 52, 54.
- Ullmann, J.F., Watson, C., Janke, A.L., Kurniawan, N.D., and Reutens, D.C. (2013). A segmentation protocol and MRI atlas of the C57BL/6J mouse neocortex. *NeuroImage* 78, 196-203.
- Whittemore, L.A., Song, K., Li, X., Aghajanian, J., Davies, M., Girgenrath, S., Hill, J.J., Jalenak, M., Kelley, P., Knight, A., *et al.* (2003). Inhibition of myostatin in adult mice increases skeletal muscle mass and strength. *Biochem Biophys Res Commun* 300, 965-971.

Wohr, M., Silverman, J.L., Scattoni, M.L., Turner, S.M., Harris, M.J., Saxena, R., and Crawley, J.N. (2013). Developmental delays and reduced pup ultrasonic vocalizations but normal sociability in mice lacking the postsynaptic cell adhesion protein neuroligin2. *Behavioural brain research* 251, 50-64.

Yang, M., and Crawley, J.N. (2009). Simple behavioral assessment of mouse olfaction. *Current protocols in neuroscience / editorial board, Jacqueline N Crawley [et al] Chapter 8, Unit 8 24.*

Yang, M., Scattoni, M.L., Zhodzishsky, V., Chen, T., Caldwell, H., Young, W.S., McFarlane, H.G., and Crawley, J.N. (2007). Social approach behaviors are similar on conventional versus reverse lighting cycles, and in replications across cohorts, in BTBR T+ tf/J, C57BL/6J, and vasopressin receptor 1B mutant mice. *Frontiers in behavioral neuroscience* 1, 1.

Yang, M., Silverman, J.L., and Crawley, J.N. (2011). Automated three-chambered social approach task for mice. *Current protocols in neuroscience / editorial board, Jacqueline N Crawley [et al] Chapter 8, Unit 8 26.*

Yuan, C.C., Zhao, X., Florens, L., Swanson, S.K., Washburn, M.P., and Hernandez, N. (2007). CHD8 associates with human Staf and contributes to efficient U6 RNA polymerase III transcription. *Mol Cell Biol* 27, 8729-8738.

## FIGURES

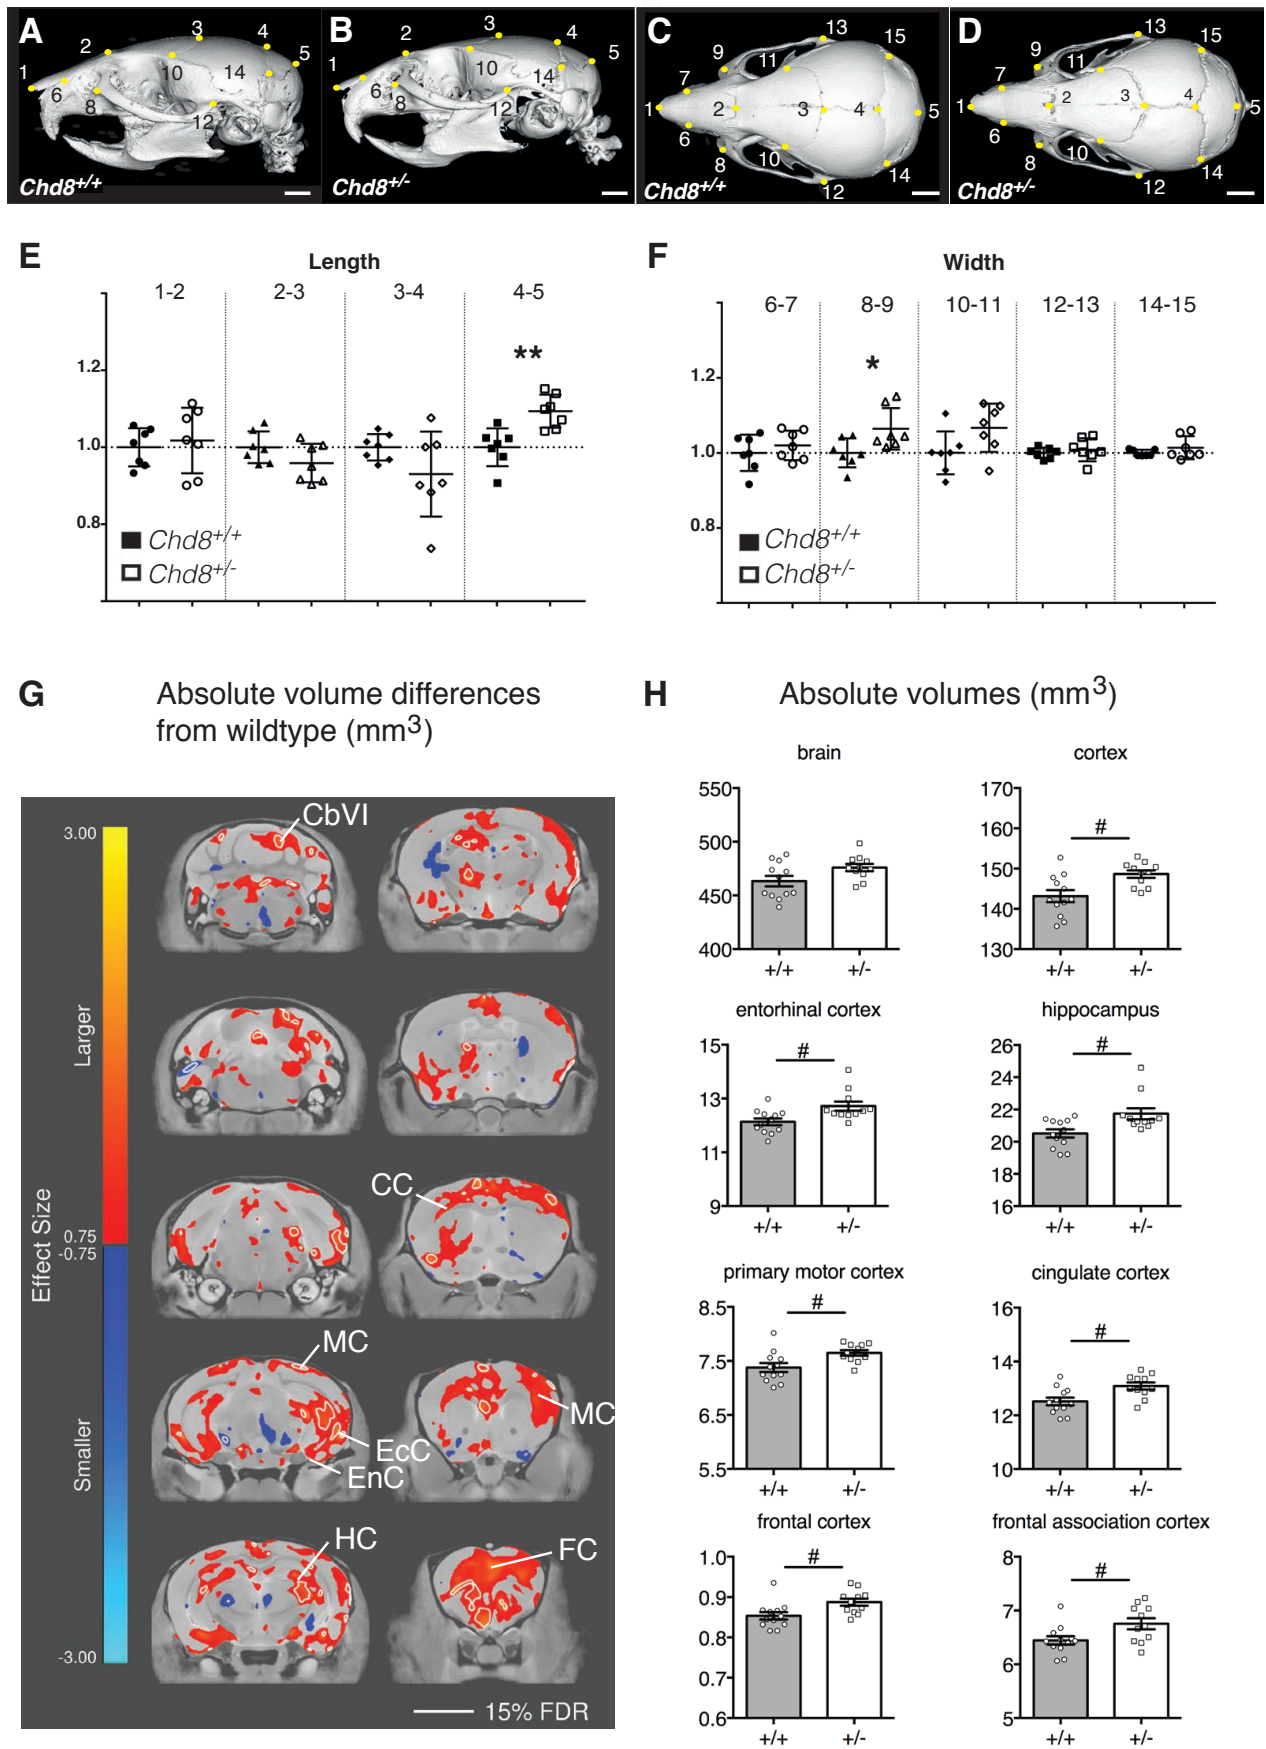

**Figure 1. Hypertelorism and mild megalencephaly in *Chd8*<sup>+/-</sup> mice.**

A-D) Representative lateral (A,B) and dorsal (C,D)  $\mu$ CT views of 3D reconstructed skulls from mice with the indicated genotypes. Landmarks from 1 to 15 are indicated by yellow dots. Scale bars = 2mm.

E,F) Graphs for measurements between indicated landmarks, normalised to average measurements from corresponding wildtype littermates. Mean $\pm$ SEM; \* $p\leq 0.05$ , \*\* $p\leq 0.01$ , student's t-test.

G) High-resolution 7T structural MRI coronal images of *Chd8*<sup>+/-</sup> brains from posterior (top left) to anterior (bottom right) are shown.

Absolute volumetric differences in size, relative to wildtype controls are coloured according to the scale on the left. Effect size is measured in units of standard deviation. Some regions with enlarged volumes are labelled as follows: CbVI – cerebellar lobule VI, MC – motor cortex, EcC – ectorhinal cortex, EnC – entorhinal cortex, HC – hippocampus, CC - Cingulate cortex, FC – frontal association cortex, AC – anterior commissure.

H) Absolute volumes (mm<sup>3</sup>) are plotted for whole brain, neocortex and several other brain regions for the different genotypes as indicated.

#FDR<0.15,  $p<0.05$  *Chd8*<sup>+/-</sup>: n=11, *Chd8*<sup>+/+</sup>: n=12.

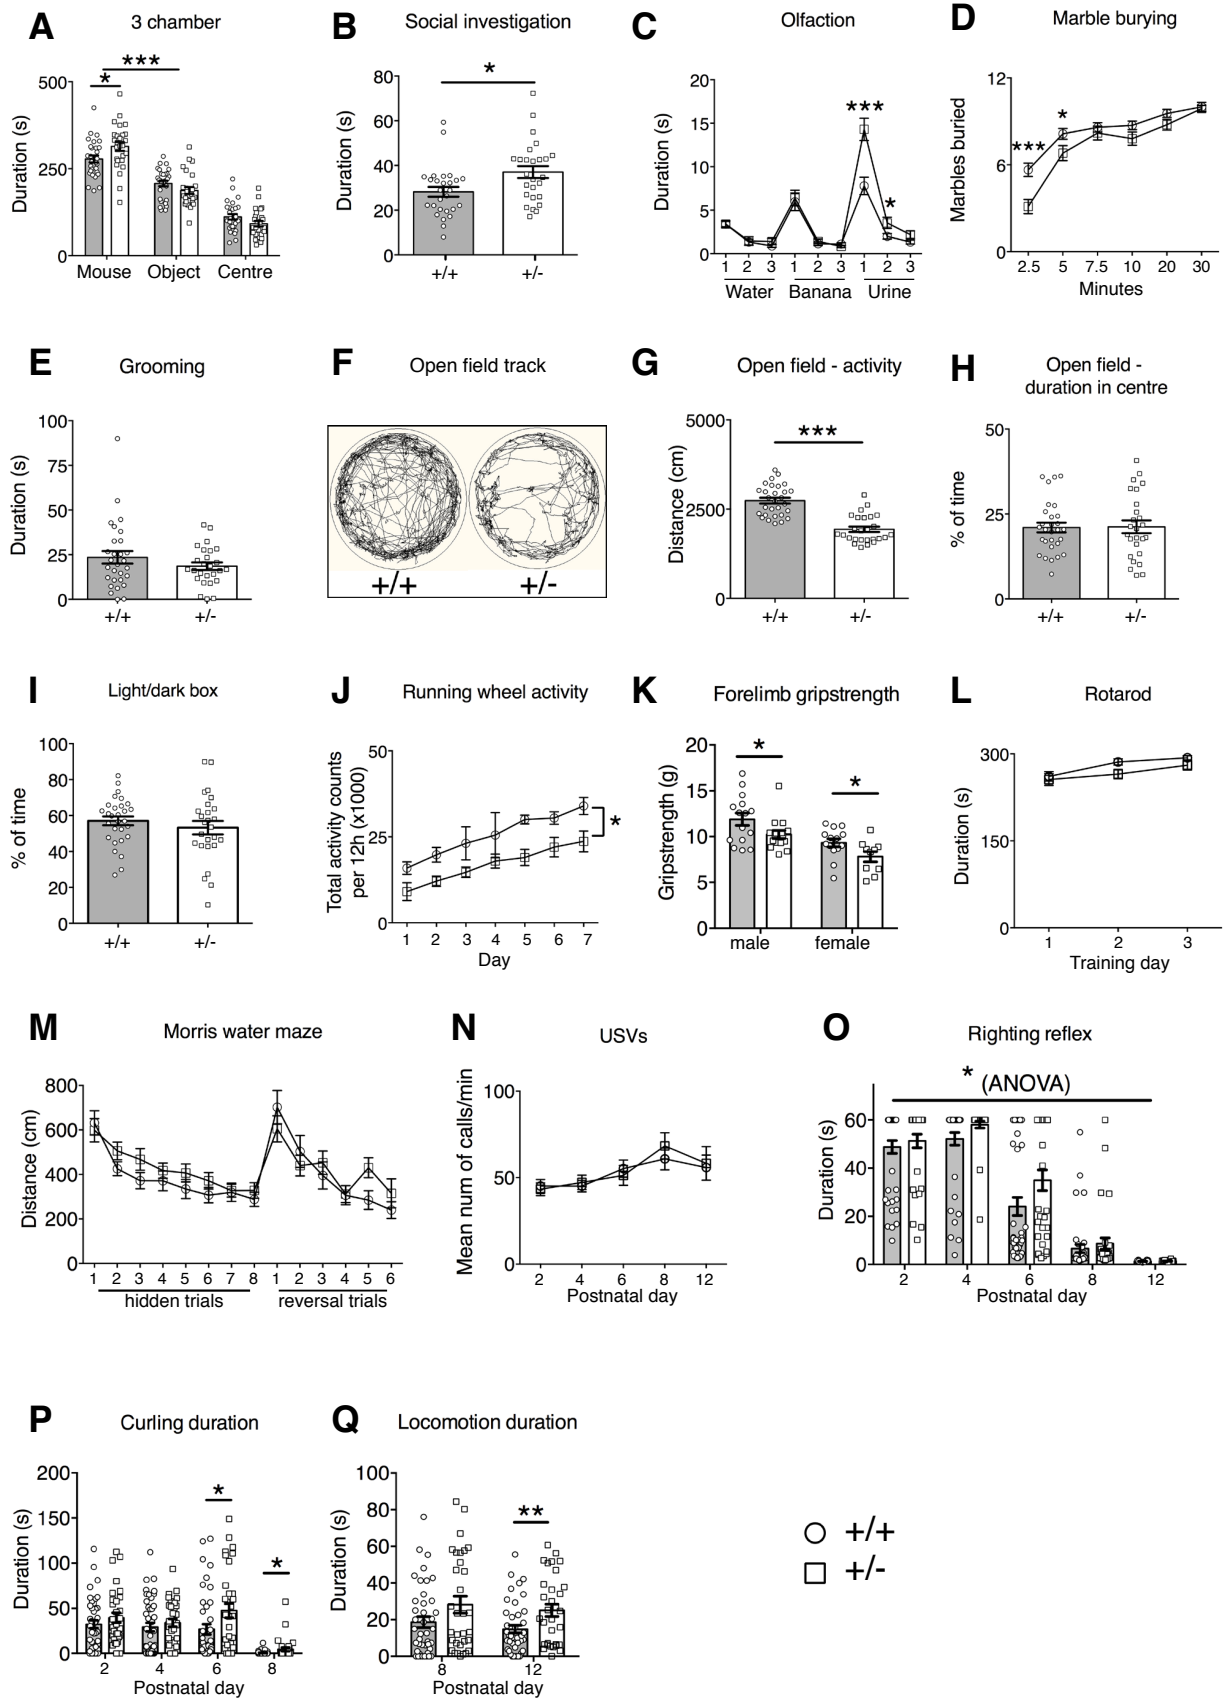

## Figure 2. Complex behavioural abnormalities in *Chd8* heterozygous mice.

A-Q) Behavioural assessments of a cohort of adult *Chd8*<sup>+/-</sup> (+/-, n=26) and *Chd8*<sup>+/+</sup> (+/+, n=29) and of pup *Chd8*<sup>+/-</sup> (+/-, n=32) and *Chd8*<sup>+/+</sup> (+/+, n=42) animals.

A) The duration, in seconds, spent in each chamber of the three-chamber sociability test. All mice spent a significantly higher proportion of time in the chamber with the age- and sex-matched stranger con-specific mouse compared to the other chambers. Mean±SEM; \*p≤0.05, \*\*\*p≤0.0001 (between-subjects ANOVA with student's t-test as post-hoc analysis).

B) Duration, in seconds, of social investigation over a three-minute period. Social investigation was defined as the combined total duration of head, body and anogenital sniffing of a conspecific mouse. Mean ±SEM; \*p≤0.05 (between-subjects ANOVA with student's t-test as post-hoc analysis).

C) Graph demonstrating the performance in the olfactory habituation/dishabituation test. Mean±SEM; \*p≤0.05, \*\*p≤0.0002 (repeated-measures ANOVA with student's t-test as post-hoc analysis).

D) The average number of marbles buried, out of a maximum of 12, within a 30-minute time period. Mean±SEM; \*p≤0.05, \*\*\*p≤0.0005 (repeated-measures ANOVA with student's t-test as post-hoc analysis).

E) The duration, in seconds, mice spent self-grooming during the 10-minute self-grooming test. Mean±SEM (between-subjects ANOVA).

F) Representative ethovision tracks of a *Chd8*<sup>+/-</sup> (+/-) and *Chd8*<sup>+/+</sup> (+/+) animal plotting their movements during the 10-minute open field task.

G) The total distance travelled in the outer part of the open field arena over a 10-minute time-period. Mean±SEM; \*\*\*p<0.0001 (between-subjects ANOVA).

H) The percentage of time spent in the centre of the open field arena during the 10-minute test. Mean±SEM (between-subjects ANOVA).

I) The percentage of time spent in the light chamber during the 5minute light/dark test. Mean±SEM (between-subjects ANOVA).

J) The total activity counts per 12h period on running wheels in the homecage during 7 days of dark-phase recording. Mean±SEM; \*p<0.05 (repeated-measures ANOVA).

K) The average of 3 measurements of forelimb grip strength on a Linton Grip Strength meter. Error bars indicate Mean ± SEM, \*p<0.05

L) The mean latency of mice to fall from the rotarod. Mean±SEM (repeated-measures ANOVA).

M) Graph plotting the average distance swum for 4 trials daily over 8 consecutive training days to find the hidden platform (hidden trials), followed by 6 training days where the location of the platform was reversed (reversal trials). Mean±SEM (repeated-measures ANOVA).

N) The mean number of ultrasonic vocalisations per minute on indicated postnatal days. Mean±SEM (repeated-measures ANOVA). O) The development of the righting reflex in pups at the indicated postnatal days. Note the

significant delay in the acquisition of the full righting reflex response in *Chd8*<sup>+/-</sup> animals compared to littermate controls (one-way repeated-measures ANOVA: F(1,72)=6.36, p=0.014, with student's t-test as post-hoc analysis). Mean ±1 SEM; \*p≤0.05.

P) The duration, in seconds, pups spend rolling on their back (curling) as recorded during the analysis of spontaneous movements during USV recordings. Note that *Chd8*<sup>+/-</sup> mice spent significantly more time curling at P6 and P8 compared to littermate controls (one-way repeated-measures ANOVA: F(1,72)=12.64, p=0.001, with student's t-test as post-hoc analysis). Mean ± SEM; \*p≤0.05.



Q) The duration, in seconds, pups spend in locomotion as recorded during the analysis of spontaneous movements during USV recordings. At P12 *Chd8*<sup>+/-</sup> animals spent significantly more time in locomotion as compared to littermate controls (one-way repeated measures ANOVA: (F(1,72)=7.33, p=0.008, with student's t-test as post-hoc analysis). Mean  $\pm$ 1SEM, \*\*p $\leq$ 0.005.

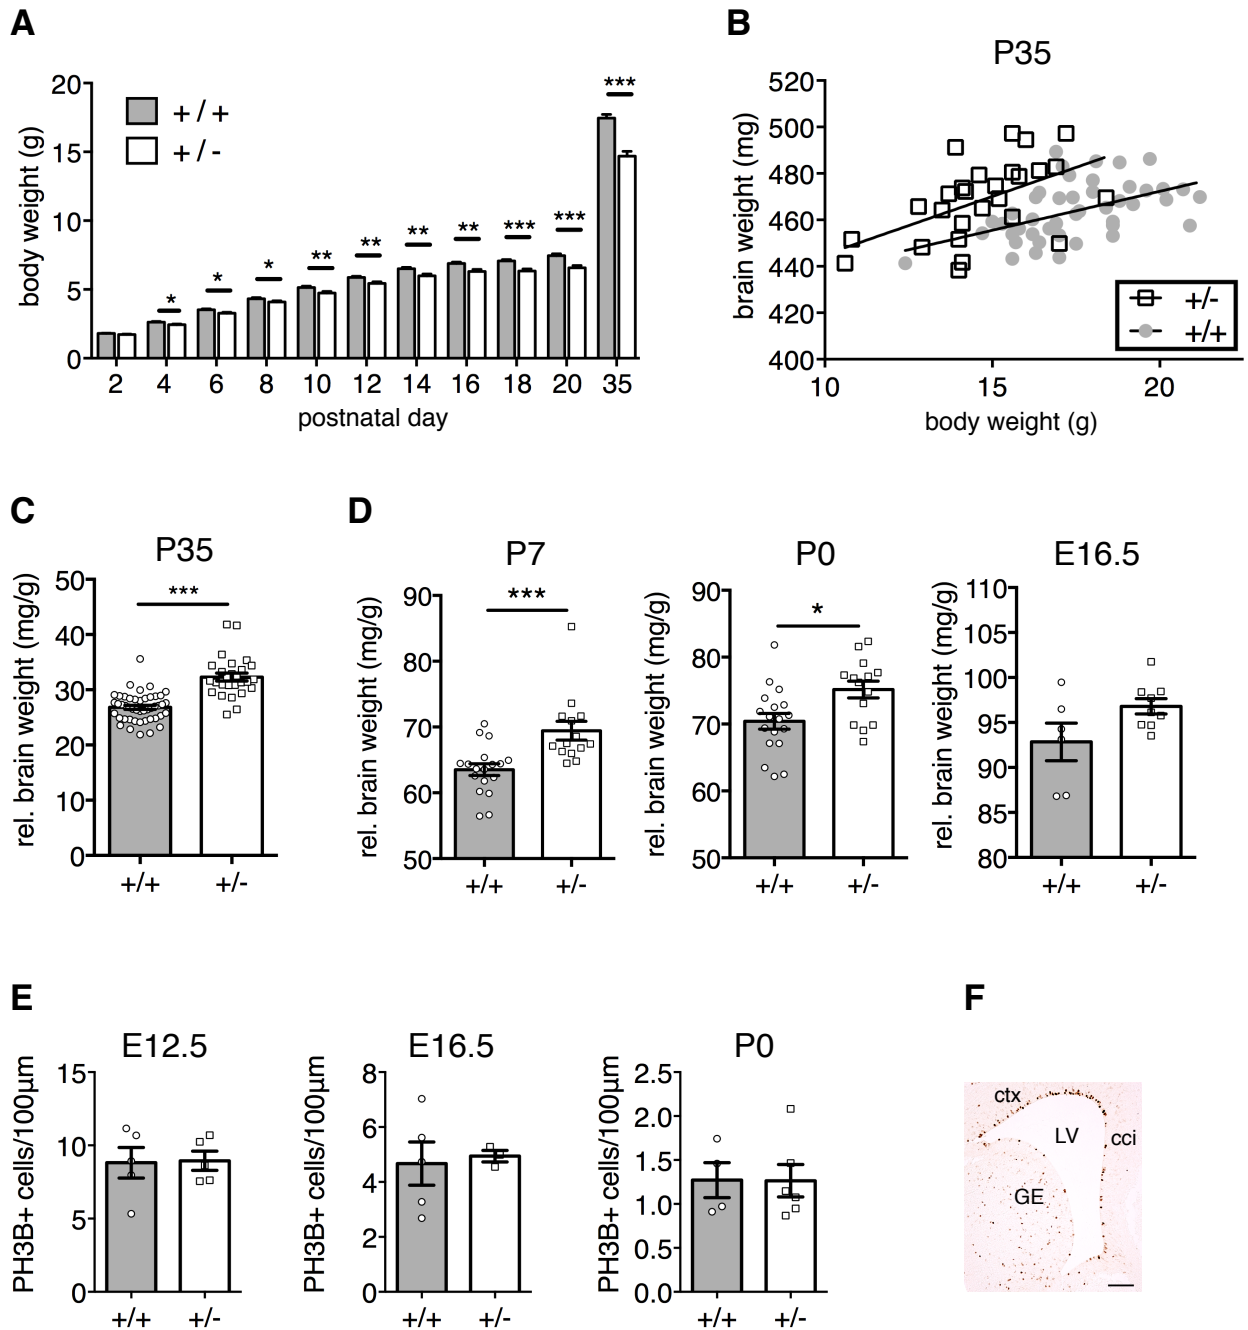

**Figure 3. *Chd8* mutants display postnatal brain hypertrophy.**

A) Body weights of mice between P2 and P35. Repeated-measures ANOVA with student's t-test as post hoc analysis. \* $p < 0.05$ , \*\* $p < 0.01$ , \*\*\* $p < 0.001$ .

B) Individual wet brain weights plotted against individual body weights for *Chd8*<sup>+/-</sup> (+/-), mice and their littermate controls (+/+) at postnatal day (P)35. Note that *Chd8*<sup>+/-</sup> mice have larger brain weights than littermate controls of equivalent body weight.

C) Wet brain weights normalised to body weight P35. *Chd8*<sup>+/-</sup> (+/-) show significantly increased normalised brain weights compared to their littermate controls (+/+). Mean  $\pm$  SEM; \*\*\* $p < 0.001$  (student's t-test). +/+, n=46; +/-, n=27.

D) Wet brain weights of pups at P7, P0 and embryonic day (E)16.5 normalised to body weight. *Chd8*<sup>+/-</sup> (+/-) pups show significantly larger normalised brain weights than their littermate controls (+/+) at P7 and P0. Mean  $\pm$  SEM; \* $p < 0.05$ , \*\*\* $p < 0.001$  (student's t-test). P7: +/+, n=18; +/-, n=14; +/+, P0: +/+, n=18; +/-, n=14; +/+, E16.5: +/+, n=6; +/-, n=9.

E) Quantification of phospho-histone H3 (PH3B) positive cells in the ventricular zone at E12.5, E16.5 and P0. Cell counts were normalized to ventricular surface length. Mean  $\pm$  SEM; student's t-test. E12.5: +/+, n=5; +/-, n=5. E16.5: +/+, n=5; +/-, n=3. P0: +/+, n=4; +/-, n=6.

F) Example of PH3B immunostaining in an E16.5 coronal brain section. Scale bar = 100 $\mu$ m; LV: lateral ventricle, ctx: cortex, cci: cingulate cortex, GE: ganglionic eminence.

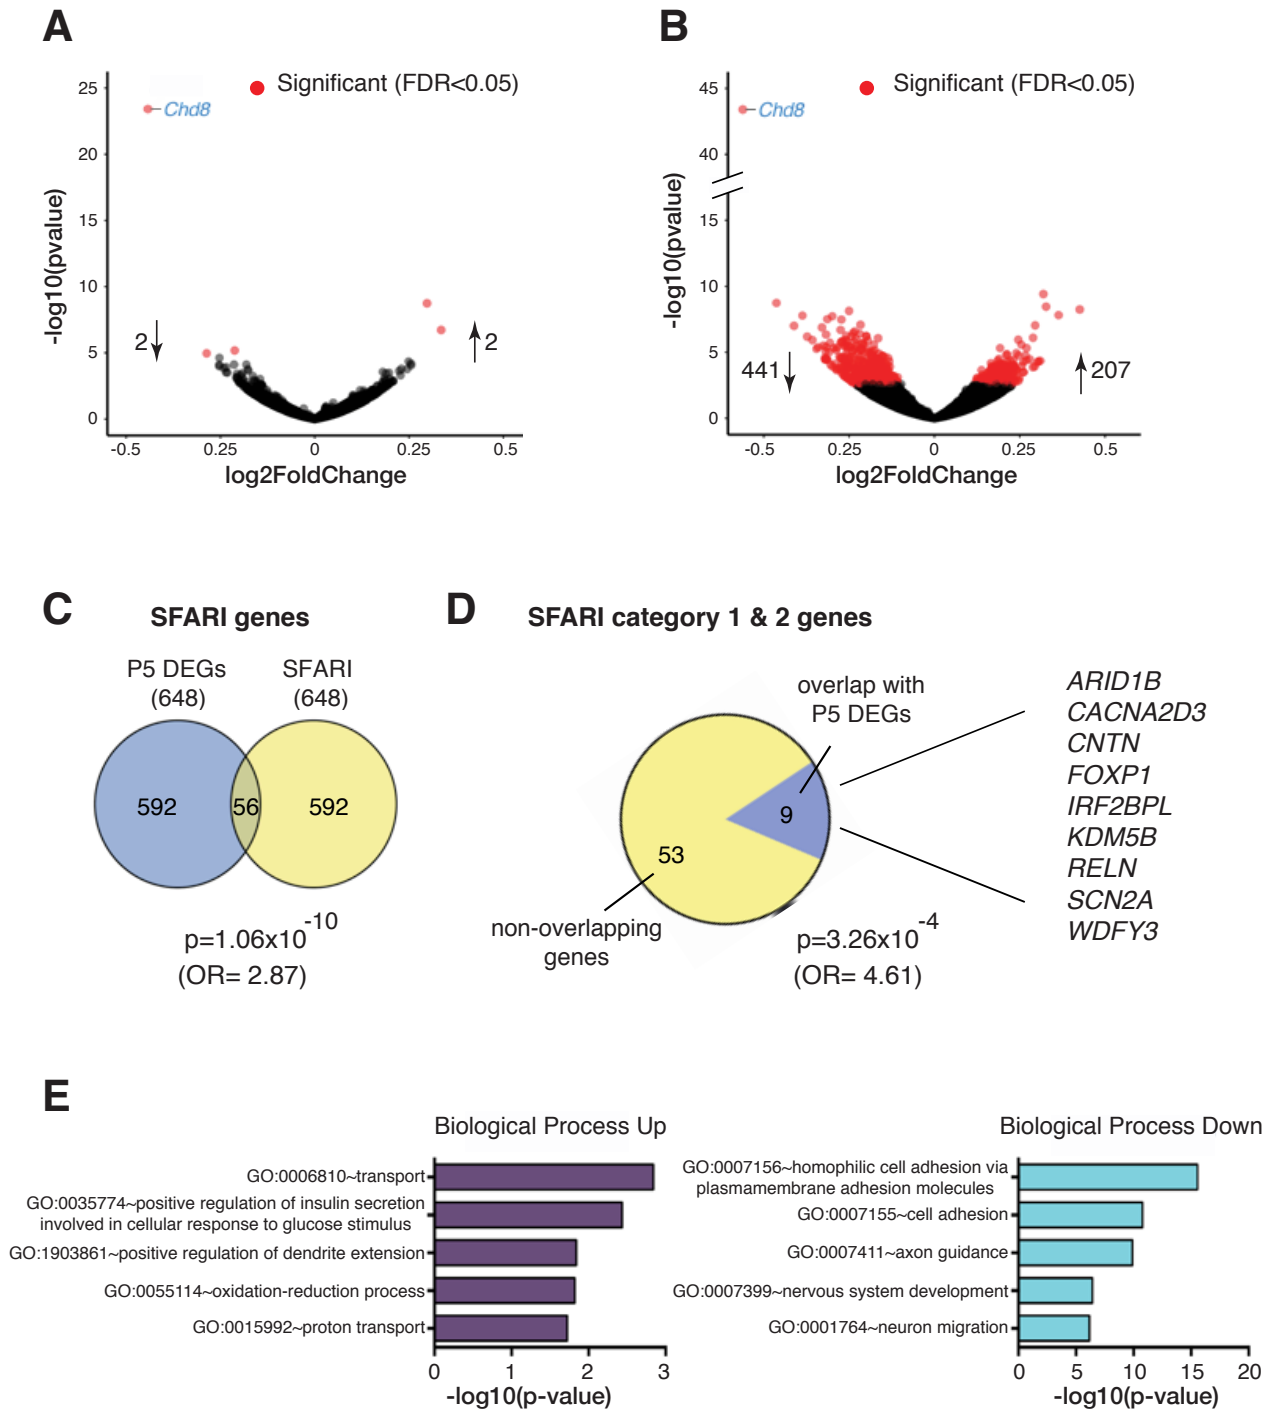

**Figure 4. Gene expression changes in *Chd8*-deficient neocortices.**

A) Volcano plot of RNA-seq data from embryonic (E12.5) *Chd8*<sup>+/-</sup> neocortex. Each point represents an individual gene and all genes differentially expressed in *Chd8*<sup>+/-</sup> samples with an FDR of 0.05 are highlighted in red.

B) Volcano plot indicating differentially expressed genes (DEGs) detected by RNA-seq in P5 *Chd8*<sup>+/-</sup> neocortex.

C) Venn diagram showing extent of overlap between P5 DEGs and ASD associated genes (categories 1-5 & S) in the SFARI gene database.

D) Pie chart showing the proportion of high confidence ASD candidate genes (categories 1-2) that are found in the P5 DEG set.

E) Results of gene set enrichment analysis using the DAVID knowledgebase on the P5 DEG set ( $FDR < 0.05$ ). The five most significant Gene Ontology terms in the Biological Processes category are shown for up-regulated DEGs (left panel) and downregulated DEGs (right panel), respectively.

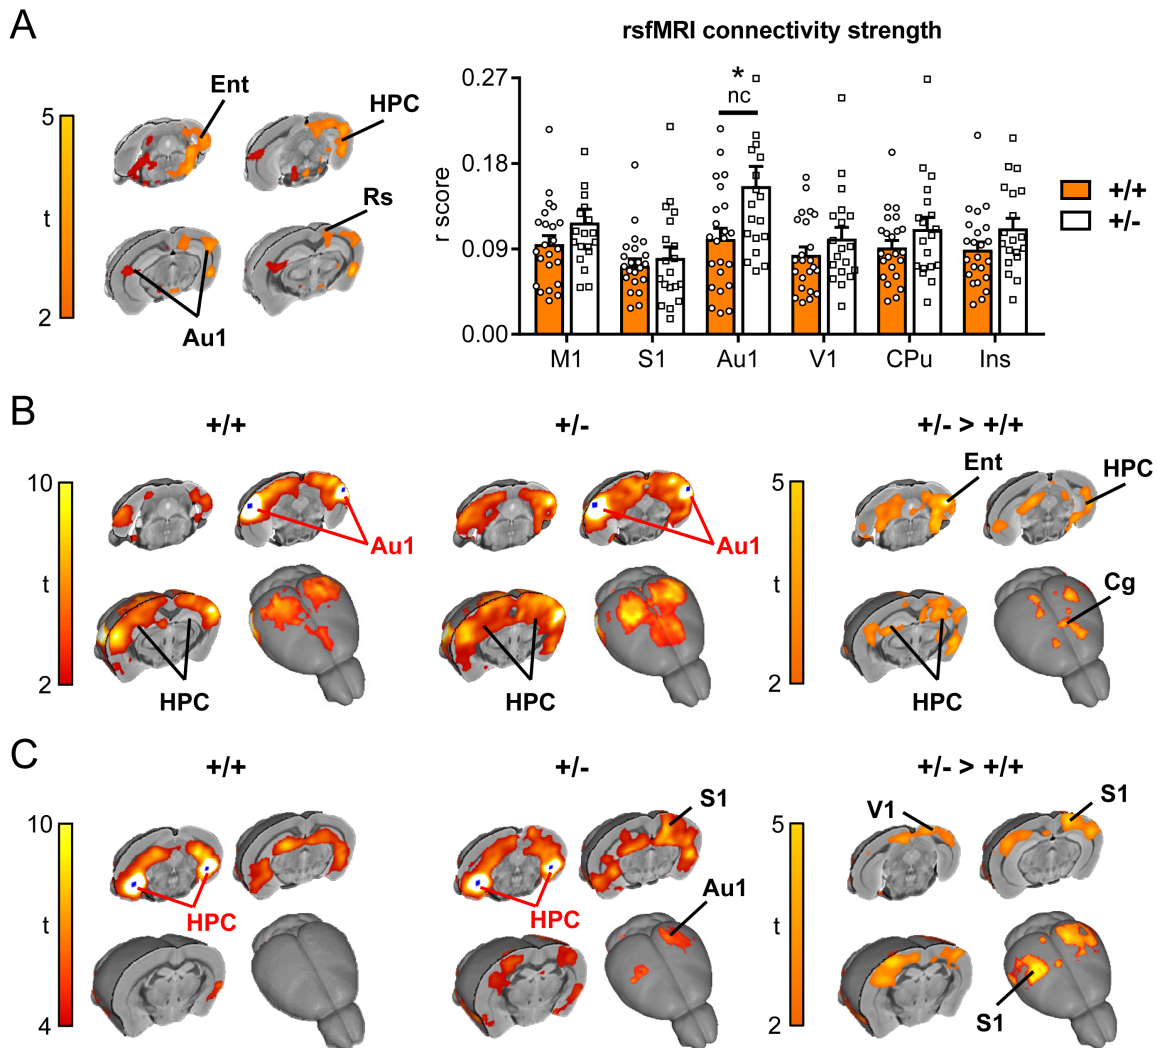

**Fig. 5: Resting state functional MRI reveals increased parieto-hippocampal connectivity in *Chd8*<sup>+/-</sup> mice**

A) Global (long range) connectivity mapping revealed bilateral foci of increased connectivity in posterior cortical and hippocampal regions in *Chd8*<sup>+/-</sup> mice with respect to control littermates (*Chd8*<sup>+/-</sup>: n=19, *Chd8*<sup>+/+</sup>: n=23). The effect is shown at a threshold  $t_{24} > 2.06$ ,  $P < 0.05$  (Fig 5A). Orange areas indicate regional rsfMRI differences surviving cluster correction ( $P = 0.05$ ). The bar plot on the right displays global connectivity strength quantification (*r score*) in bilateral areas of interest. \* $p < 0.05$ , nc = not corrected for multiple comparisons. Ent - entorhinal cortex, HPC - hippocampus, Au1 - auditory cortex, Rs - retrosplenial cortex, M1 - motor cortex, S1 - somatosensory cortex, V1 - visual cortex, CPu - caudate putamen. Ins - insular cortex.

B) Seed based connectivity mapping obtained using a bilateral auditory seed (Au1) covering foci of increased global rsfMRI connectivity depicted in A. A robust increase in rsfMRI connectivity was observed in hippocampal, entorhinal (Ent) and cingulate (Cg) regions of *Chd8*<sup>+/-</sup> mice ( $T < 2$ ,  $P_c = 0.01$ ).

C) Seed based connectivity mapping obtained using a bilateral ventro-hippocampal seed (HPC) covering bilateral foci of increased global rsfMRI connectivity in A. A significant

increase in rsfMRI connectivity was observed in peri-hippocampal and auditory/parietal (S1 and V1) regions in *Chd8*<sup>+/-</sup> mice ( $T < 2$ ,  $P_c = 0.01$ ).

## Supplementary Figures

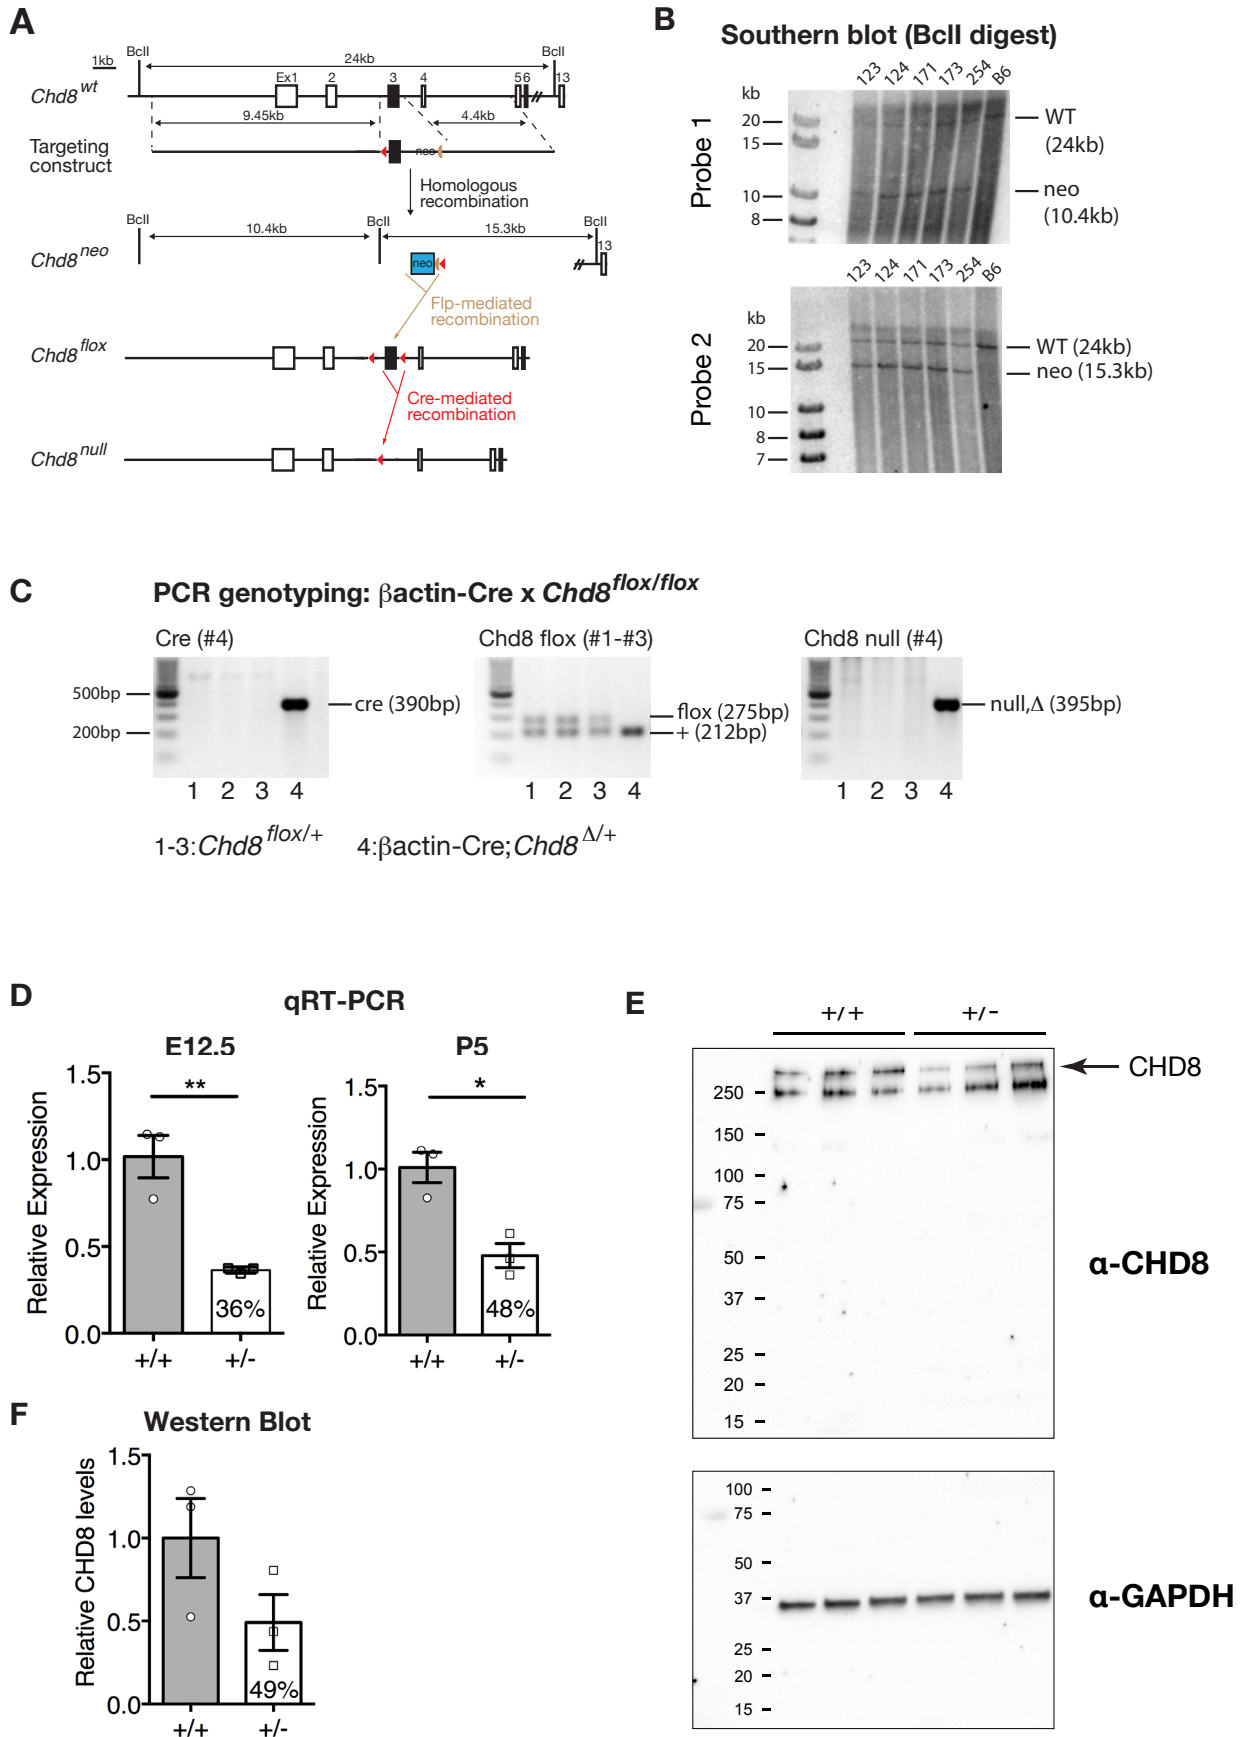



### Supplementary Figure 1. Construction and validation of the *Chd8* conditional and null alleles.

A) Diagrammatic representations of the wildtype (wt) *Chd8* locus (*Chd8*<sup>wt</sup>), targeting construct, targeted (neo), conditional (flox) and null alleles. Approximate genomic distances are indicated in kilobases (kb), exons are denoted by boxes labelled Ex1 to 13, and Southern blot probes (P1,P2) and PCR primers (#1- #4) are indicated. The 5' long homology arm is shown in red and the 3' short homology arm in green. The neomycin resistance cassette (neo) is shown as a blue box, the floxed exon 3 by a black box, loxP sites by red triangles and frt sites by tan semi-ovals. BclI restriction enzyme sites are labelled.

B) Southern blot of genomic DNA digested with BclI from embryonic stem (ES) cell clones (123, 124 etc.) and wildtype C57BL/6J (B6) cells, hybridised with P1 are shown, with molecular weight markers in the left hand lane. The wildtype allele (WT) gives a 24kb band, whilst the targeted allele gives a band of approximately 10.4kb. Southern blot of genomic DNA digested with BclI from embryonic stem (ES) cell clones as indicated and wildtype B6 cells, hybridised with P2 are shown, with molecular weight markers in the left hand lane. The wildtype allele (WT) gives a 24kb band, whilst the targeted allele gives a band of approximately 15.3kb.

C) PCR genotyping of genomic DNA extracted from mouse pups from a cross between a heterozygous general deleter *βactin-Cre* transgenic mouse and a *Chd8*<sup>flox/flox</sup> mouse. Results from PCR reactions to detect the Cre transgene, distinguish the *Chd8*<sup>flox</sup> and wildtype alleles from each other, and amplify the null allele are shown. Note the loss of the flox allele, with the gain of the null allele in the Cre<sup>+</sup> pup (lane 4).

D) Quantitative RT-PCR for *Chd8* on mRNA extracted from *Chd8* heterozygous mouse neocortices at E12.5 and P5 and littermate controls. *Chd8* expression levels in heterozygous mice are significantly reduced to 36% of wildtype controls at E12.5 (p=0.006, n=3 per genotype) and 48% at P5 (p=0.01, n=3 per genotype). \*p<0.05, \*\*p<0.01, student's t-test.

E) Western blot on lysates from *Chd8* heterozygous E12.5 neocortices and littermate controls. Upper panel: The band for full-length CHD8 (arrow, ~290kDa) was quantified in F. Note the absence of detectable levels of truncated protein products for CHD8. Lower panel: Western blot for the loading control GAPDH.

F) Quantification of CHD8 protein levels normalised to GAPDH as shown in E. CHD8 protein levels in heterozygous mice is 49% compared to wildtype littermates (p=0.16, n=3 per genotype).

**A**

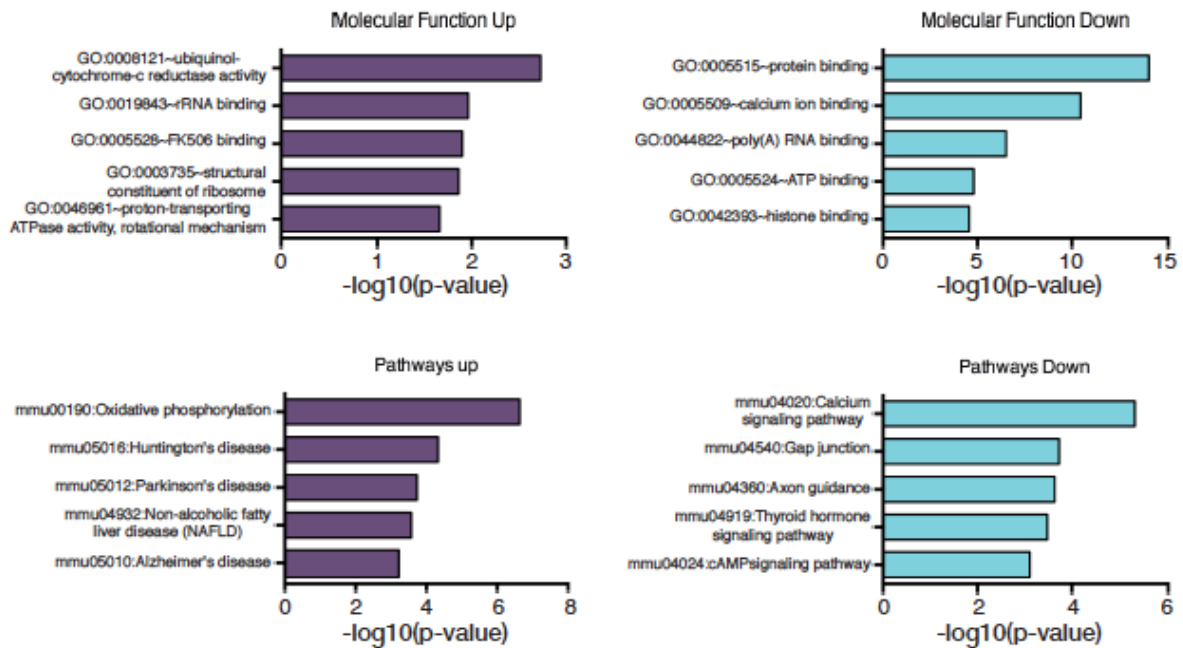

**B**

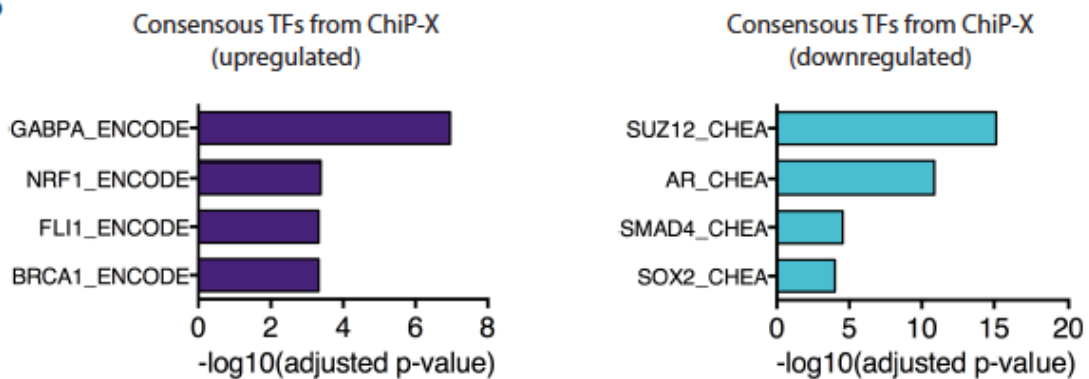

**Supplementary Figure 2: Functional Enrichment Analysis of differentially expressed genes (DEGs) in *Chd8*<sup>+/-</sup> P5 neocortices.**

A) Results of gene set enrichment analysis using the DAVID knowledgebase on the P5 DEG set (FDR < 0.05). The five most significant Gene Ontology terms in the Molecular Function category are shown for up-regulated DEGs (top left panel) and downregulated DEGs (top right panel), respectively. The five most significantly enriched KEGG pathways are shown for up-regulated DEGs (bottom left panel) and downregulated DEGs (bottom right panel).

B) DEGs (FDR < 0.05) were subjected to enrichment analysis using the “ENCODE and ChEA Consensus TFs from ChIP-X” database on Enrichr, to identify putative upstream regulatory transcription factors. The four most overrepresented transcription factors are shown for up-regulated (left) and down-regulated (right) DEGs, respectively.



## Supplementary information:

Supplementary Table 1. Absolute volumetric differences in specific brain regions between *Chd8*<sup>+/-</sup> and *Chd8*<sup>+/+</sup> mice as determined by MRI.

Supplementary Table 2. Differentially expressed genes in E12.5 *Chd8*<sup>+/-</sup> neocortices compared to wildtype controls.

Supplementary Table 3. Differentially expressed genes in P5 *Chd8*<sup>+/-</sup> neocortices compared to wildtype controls.

Supplementary Table 4. SFARI ASD genes overlapping with P5 differentially expressed genes.

Supplementary Table 5. Up-regulated Gene Ontology: Biological Processes

Supplementary Table 6. Down-regulated Gene Ontology: Biological Processes

Supplementary Table 7. Up-regulated Gene Ontology: Molecular Function

Supplementary Table 8. Down-regulated Gene Ontology: Molecular Function

Supplementary Table 9. Up-regulated Gene Ontology: Pathways

Supplementary Table 10. Down-regulated Gene Ontology: Pathways
